# Supplementary material for: TICRR serves as a prognostic biomarker in lung adenocarcinoma with implications in RNA epigenetic modification, DDR pathway, and RNA metabolism
Source: Frontiers journal article supplement (doi:10.3389/fonc.2023.1274439), 2023-12-13
Supplement: Table_1.XLS [file Table_1.XLS]

## Sheet: Table S1
Table S1 Clinical characteristics of patient in the TCGA-LUAD cohort
Clinical characteristics	High-expression (N=259)	Low-expression (N=258)	P-value
Age			0.187
<60, n (%)	77 (29.7%)	63 (24.4%)
>=60, n (%)	176 (68.0%)	191 (74.0%)
NA, n (%)	6(2.3%)	4(1.6%)
Gender			<0.001
Female, n (%)	118 (45.6%)	158 (61.2%)
Male, n (%)	141 (54.4%)	100 (38.8%)
Stage			0.205
I, n (%)	133 (51.3%)	149 (57.8%)
II, n (%)	66 (25.5%)	54 (20.9%)
III, n (%)	42 (16.2%)	39 (15.1%)
IV, n (%)	17 (6.6%)	9 (3.5%)
NA, n (%)	1(0.4%)	7(2.7%)
T-stage			0.001
T1, n (%)	66 (25.5%)	106 (41.1%)
T2, n (%)	160 (61.8%)	117 (45.3%)
T3, n (%)	23 (8.88%)	23 (8.91%)
T4, n (%)	8 (3.09%)	11 (4.26%)
TX, n (%)	2 (0.77%)	1 (0.39%)
N-stage			0.355
N0, n (%)	166 (64.1%)	170 (65.9%)
N1, n (%)	48 (18.5%)	46 (17.8%)
N2, n (%)	39 (15.1%)	32 (12.4%)
N3, n (%)	2 (0.77%)	0 (0.00%)
NX, n (%)	4 (1.54%)	9 (3.50%)
NA, n (%)	0(0%)	1 (0.39%)
M-stage			0.194
M0, n (%)	170 (65.6%)	175 (67.8%)
M1, n (%)	17 (6.6%)	8 (3.1%)
MX, n (%)	71 (27.4%)	71 (27.5%)
NA, n (%)	1(0.4%)	4(1.6%)
Tissue origine			0.215
Lower lobe	80 (30.9%)	93 (36.0%)
Middle lobe	10 (3.86%)	11 (4.26%)
Other	6 (2.32%)	12 (4.65%)
Upper lobe	163 (62.9%)	142 (55.0%)
Smoking Status			0.003
non-smoke, n (%)	65 (25.1%)	97 (37.6%)
smoke, n (%)	194 (74.9%)	161 (62.4%)
Race			0.781
american indian or alaska native	1 (0.39%)	0 (0.00%)
asian	4 (1.54%)	3 (1.16%)
black or african american	26 (10.0%)	28 (10.9%)
Unknown	32 (12.4%)	25 (9.69%)
white	196 (75.7%)	202 (78.3%)
OS_Status			0.059
Alive, n (%)	155 (59.8%)	176 (68.2%)
Dead, n (%)	104 (40.2%)	82 (31.8%)
Median TMB （mutations/Mb）			0.006
TMB>=10, n (%)	17 (6.6%)	9 (3.5%)
TMB<10, n (%)	72 (27.8%)	131 (50.8%)
NA, n (%)	170(65.6%)	118(45.7%)
mOS (days)	1258	1632	0.193

## Sheet: Table S2
Table S2 Clinical characteristics of patient in the GSE50081 cohort
Clinical characteristics	High-expression (N=63)	Low-expression (N=64)	P-value
Age			0.645
<60, n (%)	8 (12.7%)	11 (17.2%)
>=60, n (%)	55 (87.3%)	53 (82.8%)
Gender			0.656
Female, n (%)	29 (46.0%)	33 (51.6%)
Male, n (%)	34 (54.0%)	31 (48.4%)
Stage			0.396
I, n (%)	43 (68.3%)	49 (76.6%)
II, n (%)	20 (31.7%)	15 (23.4%)
T-stage			0.002
T1, n (%)	13 (20.6%)	30 (46.9%)
T2, n (%)	48 (76.2%)	34 (53.1%)
T3, n (%)	2 (3.17%)	0 (0.00%)
N-stage			0.647
N0, n (%)	45 (71.4%)	49 (76.6%)
N1, n (%)	18 (28.6%)	15 (23.4%)
M-stage			.
M0, n (%)	63 (100%)	64 (100%)
Smoking Status			0.015
Current , n (%)	23 (36.5%)	13 (20.3%)
Ex-smoker , n (%)	28 (44.4%)	28 (43.8%)
Never , n (%)	5 (7.94%)	18 (28.1%)
Unable to determine, n (%)	7 (11.1%)	5 (7.81%)
OS_Status			0.009
Alive, n (%)	30 (47.6%)	46 (71.9%)
Dead, n (%)	33 (52.4%)	18 (28.1%)
mOS(days)	1792	NA	0.006
mDFS (days)	1317	NA	0.006
Recurrence			0.399
No, n (%)	40 (63.5%)	47 (73.4%)
Unknown, n (%)	1 (1.59%)	2 (3.12%)
Yes, n (%)	22 (34.9%)	15 (23.4%)

## Sheet: Table S3
Table S3 Clinical characteristics of patient in the GSE72094 cohort
Clinical characteristics	High-expression (N=199)	Low-expression (N=199)	P-value
Age			0.003
<60, n (%)	40 (20.1%)	18 (9.05%)
>=60, n (%)	159 (79.9%)	181 (91.0%)
Gender			0.480
Female, n (%)	115 (57.8%)	107 (53.8%)
Male, n (%)	84 (42.2%)	92 (46.2%)
Stage			0.005
I, n (%)	112 (57.1%)	142 (72.1%)
II, n (%)	40 (20.4%)	27 (13.7%)
III, n (%)	38 (19.4%)	19 (9.64%)
IV, n (%)	6 (3.06%)	9 (4.57%)
Smoking Status			0.646
Ever, n (%)	152 (76.4%)	148 (74.4%)
Missing, n (%)	34 (17.1%)	33 (16.6%)
Never, n (%)	13 (6.53%)	18 (9.05%)
RACE			0.721
Black, n (%)	5 (2.51%)	8 (4.02%)
Other, n (%)	3 (1.51%)	4 (2.01%)
VIETNAMESE(%)	1 (0.50%)	0 (0.00%)
White, n (%)	190 (95.5%)	187 (94.0%)
OS_Status			0.002
Alive, n (%)	128 (64.3%)	157 (78.9%)
Dead, n (%)	71 (35.7%)	42 (21.1%)
mOS (days)	1231	NA	0.019

## Sheet: Table S4
Table S4 Clinical characteristics of patient in the GSE13213 cohort
Clinical characteristics	High-expression (N=58)	Low-expression (N=58)	P-value
Histology subtype			.
LUAD, n (%)	58 (100%)	58 (100%)
Age			0.847
<60, n (%)	22 (37.9%)	20 (34.5%)
>=60, n (%)	36 (62.1%)	38 (65.5%)
Gender			0.353
Female, n (%)	25 (43.1%)	31 (53.4%)
Male, n (%)	33 (56.9%)	27 (46.6%)
Relapse			0.003
No, n (%)	21 (36.2%)	37 (63.8%)
Unknown, n (%)	0 (0.00%)	1 (1.72%)
Yes, n (%)	37 (63.8%)	20 (34.5%)
Stage			0.030
I, n (%)	33 (56.9%)	46 (79.3%)
II, n (%)	8 (13.8%)	5 (8.62%)
III, n (%)	17 (29.3%)	7 (12.1%)
T-stage			0.393
T1, n (%)	23 (39.7%)	31 (53.4%)
T2, n (%)	28 (48.3%)	21 (36.2%)
T3, n (%)	5 (8.62%)	3 (5.17%)
T4, n (%)	2 (3.45%)	3 (5.17%)
N-stage			0.006
N0, n (%)	36 (62.1%)	51 (87.9%)
N1, n (%)	6 (10.3%)	2 (3.45%)
N2, n (%)	16 (27.6%)	5 (8.62%)
M-stage			.
M0, n (%)	58 (100%)	58 (100%)
Smoking Status			0.003
No, n (%)	19 (32.8%)	36 (62.1%)
Yes , n (%)	39 (67.2%)	22 (37.9%)
OS_Status			0.014
Alive, n (%)	27 (46.6%)	41 (70.7%)
Dead, n (%)	31 (53.4%)	17 (29.3%)
mOS (days)	2050	NA	0.007
KRAS status			0.268
Mut, n (%)	10 (17.2%)	5 (8.62%)
Wt, n (%)	48 (82.8%)	53 (91.4%)
TP53 status			0.110
Mut, n (%)	23 (39.7%)	14 (24.1%)
N/A,n(%)	0 (0.00%)	1 (1.72%)
Wt, n (%)	35 (60.3%)	43 (74.1%)
EGFR status			0.253
Mut, n (%)	19 (32.8%)	26 (44.8%)
Wt, n (%)	39 (67.2%)	32 (55.2%)

## Sheet: Table S5
Table S5 Clinical characteristics of patient in the GSE30219 cohort
Clinical characteristics	High-expression (N=42)	Low-expression (N=43)	P-value
Histology subtype			.
LUAD, n (%)	42 (100%)	43 (100%)
Age			0.065
<60, n (%)	23 (54.8%)	14 (32.6%)
>=60, n (%)	19 (45.2%)	29 (67.4%)
Gender			0.325
Female, n (%)	7 (16.7%)	12 (27.9%)
Male, n (%)	35 (83.3%)	31 (72.1%)
Relapse			0.004
No, n (%)	22 (52.4%)	36 (83.7%)
Yes, n (%)	20 (47.6%)	7 (16.3%)
T-stage			0.005
T1, n (%)	30 (71.4%)	41 (95.3%)
T2, n (%)	10 (23.8%)	2 (4.65%)
T3, n (%)	2 (4.76%)	0 (0.00%)
N-stage			0.116
N0, n (%)	39 (92.9%)	43 (100%)
N1, n (%)	3 (7.14%)	0 (0.00%)
OS_Status			0.022
Alive, n (%)	14 (33.3%)	26 (60.5%)
Dead, n (%)	28 (66.7%)	17 (39.5%)
mDFS (days)	1500	4920	0.124
mOS (days)	1650	5250	0.463

## Sheet: Table S6
Table S6 Clinical characteristics of patient in the GSE41271 cohort
Clinical characteristics	High-expression (N=90)	Low-expression (N=92)	P-value
Histology subtype			.
LUAD, n (%)	90 (100%)	92 (100%)
Age			0.628
<60, n (%)	16 (17.8%)	20 (21.7%)
>=60, n (%)	74 (82.2%)	72 (78.3%)
Gender			0.373
Female, n (%)	41 (45.6%)	49 (53.3%)
Male, n (%)	49 (54.4%)	43 (46.7%)
Stage			0.010
I, n (%)	40 (44.4%)	60 (65.2%)
I Vs III,n(%)	0 (0.00%)	1 (1.09%)
II, n (%)	20 (22.2%)	8 (8.70%)
III, n (%)	27 (30.0%)	22 (23.9%)
IV, n (%)	3 (3.33%)	1 (1.09%)
Smoking Status			0.002
Unknown, n (%)	1 (1.11%)	0 (0.00%)
non-smoke, n (%)	5 (5.56%)	20 (21.7%)
smoke, n (%)	84 (93.3%)	72 (78.3%)
Race			0.086
African American	5 (5.56%)	6 (6.52%)
Asian	1 (1.11%)	6 (6.52%)
Caucasian	83 (92.2%)	75 (81.5%)
Hispanic	1 (1.11%)	5 (5.43%)
OS_Status			0.007
Alive, n (%)	46 (51.1%)	66 (71.7%)
Dead, n (%)	44 (48.9%)	26 (28.3%)
mOS (days)	1534	3262
Recurrence			0.380
No, n (%)	51 (56.7%)	59 (64.1%)
Yes, n (%)	39 (43.3%)	33 (35.9%)

## Sheet: Table S7
Table S7 Clinical characteristics of patient in the GSE42127 cohort
Clinical characteristics	High-expression (N=66)	Low-expression (N=67)	P-value
Histology subtype			.
LUAD, n (%)	66 (100%)	67 (100%)
Age			1.000
<60, n (%)	18 (27.3%)	19 (28.4%)
>=60, n (%)	48 (72.7%)	48 (71.6%)
Gender			0.793
Female, n (%)	31 (47.0%)	34 (50.7%)
Male, n (%)	35 (53.0%)	33 (49.3%)
Stage			0.017
I, n (%)	39 (59.1%)	50 (74.6%)
II, n (%)	17 (25.8%)	5 (7.46%)
III, n (%)	9 (13.6%)	11 (16.4%)
IV, n (%)	1 (1.52%)	0 (0.00%)
Unknown, n (%)	0 (0.00%)	1 (1.49%)
adjuvant_Chemotherapy			1.000
No, n (%)	47 (71.2%)	47 (70.1%)
Yes, n (%)	19 (28.8%)	20 (29.9%)
OS_Status			0.008
Alive, n (%)	37 (56.1%)	53 (79.1%)
Dead, n (%)	29 (43.9%)	14 (20.9%)
mOS (days)	2196	NA	0.030

## Sheet: Table S8
Table S8 2^-(∆∆Ct) value of RT-qPCR experiment for 16 pairs tumor and normal samples from LUAD patients
Sample ID	TICRR
Pt1-P	3.05816
Pt2-P	0.494118
Pt3-P	1.58142
Pt4-P	0.732477
Pt5-P	0.759514
Pt6-P	0.501092
Pt7-P	0.5686
Pt8-P	0.894506
Pt9-P	9.06692
Pt10-P	0.655479
Pt11-P	4.39822
Pt12-P	0.191916
Pt13-P	0.408941
Pt14-P	1.88112
Pt15-P	0.303484
Pt16-P	2.52002
Pt1-T	1.64993
Pt2-T	2.45786
Pt3-T	2.29931
Pt4-T	1.96949
Pt5-T	0.66615
Pt6-T	3.55237
Pt7-T	0.528917
Pt8-T	6.17626
Pt9-T	4.23438
Pt10-T	1.46602
Pt11-T	1.24631
Pt12-T	1.35861
Pt13-T	13.1452
Pt14-T	9.30861
Pt15-T	1.51497
Pt16-T	41.297

## Sheet: Table S9
Table S9 Univariable and multivariable Cox regression analyses of characteristics and TICRR with overall survival in TCGA-LUAD cohort.
Variable	Univariate cox					Multivariate cox
	HR	5%CI	95%CI	CI	p	HR	5%CI	95%CI	CI	p
Age	1.23	0.92	1.64	0.92 - 1.64	0.171
Gender	1.06	0.79	1.41	0.79 - 1.41	0.711
T stage
T1
T2	1.49	1.05	2.13	1.05 - 2.13	0.027	1.19	0.82	1.71	0.82 - 1.71	0.3657
T3	2.96	1.76	4.98	1.76 - 4.98	0	2.18	1.17	4.06	1.17 - 4.06	0.0137
T4	3.27	1.72	6.22	1.72 - 6.22	0	1.68	0.8	3.54	0.8 - 3.54	0.1733
TX	4.77	1.15	19.85	1.15 - 19.85	0.032	1.22	0.1	14.93	0.1 - 14.93	0.8774
N stage
N0
N1	2.39	1.7	3.36	1.7 - 3.36	0	1.81	1.02	3.19	1.02 - 3.19	0.041
N2	3.12	2.14	4.54	2.14 - 4.54	0	1.48	0.64	3.41	0.64 - 3.41	0.355
N3	0	0	Inf	0 - Inf	0.994	0	0	Inf	0 - Inf	0.9942
NX	1.42	0.52	3.86	0.52 - 3.86	0.497	1.19	0.29	4.86	0.29 - 4.86	0.8101
M stage
M0
M1	2.09	1.22	3.58	1.22 - 3.58	0.007	0.25	0.01	4.16	0.01 - 4.16	0.3334
MX	0.85	0.59	1.21	0.59 - 1.21	0.362	0.93	0.64	1.35	0.64 - 1.35	0.7107
Stage
Stage I
Stage II	2.45	1.71	3.51	1.71 - 3.51	0	1.3	0.71	2.39	0.71 - 2.39	0.4015
Stage III	3.56	2.44	5.19	2.44 - 5.19	0	1.97	0.79	4.87	0.79 - 4.87	0.144
Stage IV	3.81	2.2	6.59	2.2 - 6.59	0	10	0.55	180.97	0.55 - 180.97	0.1191
Smoke_status	0.9	0.66	1.22	0.66 - 1.22	0.492
TICRR	1.47	1.1	1.96	1.1 - 1.96	0.01	1.44	1.06	1.95	1.06 - 1.95	0.0183

## Sheet: Table S10
Table S10 Correlation analysis between TICRR and other genes in TCGA-LUAD.
Gene	Genesets	Cor	P.value
TICRR	TSPAN6	0.177226	4.36324e-05
TICRR	DPM1	0.448401	2.21531e-27
TICRR	SCYL3	0.181241	2.89588e-05
TICRR	C1orf112	0.713383	5.90139e-83
TICRR	FUCA2	0.496322	4.61827e-34
TICRR	GCLC	0.392966	7.20238e-21
TICRR	NFYA	0.477517	2.58646e-31
TICRR	STPG1	0.179467	3.47479e-05
TICRR	LAS1L	0.472566	1.28368e-30
TICRR	SEMA3F	0.417979	1.17094e-23
TICRR	CFTR	-0.203046	2.66987e-06
TICRR	ANKIB1	0.55501	7.90167e-44
TICRR	CYP51A1	0.309204	4.07284e-13
TICRR	KRIT1	0.450216	1.29173e-27
TICRR	RAD52	0.421272	4.82513e-24
TICRR	MYH16	0.462684	2.90726e-29
TICRR	BAD	0.14259	0.00104081
TICRR	LAP3	0.323964	2.56108e-14
TICRR	CD99	0.323956	2.5654e-14
TICRR	HS3ST1	0.139173	0.00137482
TICRR	WNT16	0.23143	7.95331e-08
TICRR	HECW1	0.16497	0.00014434
TICRR	MAD1L1	0.400534	1.09269e-21
TICRR	LASP1	0.444513	6.95753e-27
TICRR	SNX11	0.295422	4.70507e-12
TICRR	M6PR	0.382203	9.69398e-20
TICRR	KLHL13	0.18006	3.27016e-05
TICRR	CYP26B1	0.37768	2.80897e-19
TICRR	ICA1	0.268792	3.71226e-10
TICRR	DBNDD1	0.329173	9.29847e-15
TICRR	ALS2	0.499769	1.38637e-34
TICRR	CASP10	0.128152	0.00323697
TICRR	CFLAR	0.153896	0.000396682
TICRR	NDUFAF7	0.397462	2.36317e-21
TICRR	RBM5	0.198879	4.29929e-06
TICRR	MTMR7	0.221962	2.70666e-07
TICRR	ARF5	0.271522	2.42312e-10
TICRR	SARM1	0.138126	0.0014954
TICRR	POLDIP2	0.413903	3.4607e-23
TICRR	PLXND1	0.169593	9.2806e-05
TICRR	AK2	0.17296	6.67877e-05
TICRR	CD38	0.106517	0.0145227
TICRR	FKBP4	0.532286	8.08677e-40
TICRR	KDM1A	0.572193	4.51108e-47
TICRR	RBM6	0.331076	6.39062e-15
TICRR	CAMKK1	0.0876123	0.0445962
TICRR	RECQL	0.531039	1.31539e-39
TICRR	VPS50	0.425024	1.73611e-24
TICRR	HSPB6	-0.11565	0.007931
TICRR	ARHGAP33	0.440926	1.97422e-26
TICRR	NDUFAB1	0.283833	3.33426e-11
TICRR	ZMYND10	-0.114993	0.00829498
TICRR	SLC25A13	0.577173	4.76545e-48
TICRR	CDC27	0.586636	5.9751e-50
TICRR	CALCR	0.156108	0.000325842
TICRR	HCCS	0.41556	2.23169e-23
TICRR	DVL2	0.463451	2.28971e-29
TICRR	PRSS22	0.206069	1.87804e-06
TICRR	UPF1	0.357319	2.76058e-17
TICRR	SKAP2	0.347189	2.40033e-16
TICRR	SLC25A5	0.272362	2.12323e-10
TICRR	MCUB	0.327964	1.1784e-14
TICRR	HOXA11	0.383517	7.09379e-20
TICRR	POLR2J	0.312095	2.39753e-13
TICRR	DHX33	0.611861	2.44679e-55
TICRR	MEOX1	-0.149948	0.000559837
TICRR	THSD7A	0.297952	3.03175e-12
TICRR	LIG3	0.586542	6.2458e-50
TICRR	RPAP3	0.57601	8.08221e-48
TICRR	ACSM3	-0.196003	5.93854e-06
TICRR	REXO5	0.559807	1.02659e-44
TICRR	CIAPIN1	0.369527	1.83444e-18
TICRR	SPPL2B	0.353993	5.66421e-17
TICRR	FAM214B	0.326955	1.43487e-14
TICRR	MSL3	0.318161	7.74008e-14
TICRR	CREBBP	0.355436	4.15101e-17
TICRR	MPO	0.222556	2.5104e-07
TICRR	GCFC2	0.476128	4.06436e-31
TICRR	WDR54	0.257312	2.11833e-09
TICRR	CROT	0.135622	0.00182412
TICRR	KMT2E	0.295241	4.8544e-12
TICRR	RHBDD2	0.151431	0.000492378
TICRR	SOX8	-0.167823	0.00011006
TICRR	IBTK	0.386623	3.37185e-20
TICRR	ZNF195	0.399461	1.43187e-21
TICRR	MYCBP2	0.28841	1.55509e-11
TICRR	ITGAL	0.093231	0.0325333
TICRR	ZFX	0.251566	4.90999e-09
TICRR	LAMP2	0.222202	2.62573e-07
TICRR	ITGA2B	0.291119	9.83801e-12
TICRR	REX1BD	0.185641	1.82905e-05
TICRR	OSBPL7	0.169916	8.99543e-05
TICRR	YBX2	0.419754	7.26913e-24
TICRR	KRT33A	0.113568	0.00913678
TICRR	MAP3K14	0.286758	2.05129e-11
TICRR	CACNG3	0.092919	0.0331213
TICRR	TMEM132A	0.549767	7.08565e-43
TICRR	AP2B1	0.427913	7.83509e-25
TICRR	TAC1	0.155695	0.000338118
TICRR	ZNF263	0.323604	2.74527e-14
TICRR	CX3CL1	-0.100064	0.0217191
TICRR	SPATA20	0.216032	5.67327e-07
TICRR	TNFRSF12A	0.125706	0.00388153
TICRR	DLX6	0.3528	7.31464e-17
TICRR	MAP3K9	0.390476	1.32568e-20
TICRR	RALA	0.494231	9.51765e-34
TICRR	BAIAP2L1	0.396429	3.05739e-21
TICRR	KDM7A	0.272892	1.95276e-10
TICRR	ETV1	-0.137191	0.00161125
TICRR	AGK	0.459642	7.44285e-29
TICRR	ALDH3B1	-0.0921018	0.0347044
TICRR	TTC22	0.194355	7.13082e-06
TICRR	PHTF2	0.435357	9.72769e-26
TICRR	CCL26	0.378826	2.14863e-19
TICRR	FARP2	0.530982	1.34475e-39
TICRR	USH1C	0.173501	6.33177e-05
TICRR	GGCT	0.390122	1.44504e-20
TICRR	DBF4	0.727496	8.92062e-88
TICRR	TBXA2R	0.255695	2.68951e-09
TICRR	IFRD1	0.560848	6.56031e-45
TICRR	LGALS14	0.226913	1.43601e-07
TICRR	COX10	0.40421	4.29507e-22
TICRR	GTF2IRD1	0.526462	7.715e-39
TICRR	PAF1	0.351965	8.74374e-17
TICRR	VPS41	0.292344	7.98466e-12
TICRR	ARHGAP44	-0.127198	0.00347588
TICRR	ELAC2	0.383706	6.7809e-20
TICRR	MYH13	0.233559	5.99351e-08
TICRR	ADIPOR2	0.529071	2.82334e-39
TICRR	CDKL3	0.161622	0.000197305
TICRR	PRSS21	0.129476	0.00293033
TICRR	MARK4	0.494324	9.21727e-34
TICRR	CCDC124	0.32076	4.73021e-14
TICRR	CEACAM21	-0.105584	0.0154115
TICRR	PAFAH1B1	0.296142	4.15381e-12
TICRR	NOS2	0.24231	1.82138e-08
TICRR	DNAH9	-0.188674	1.32413e-05
TICRR	KIAA0100	0.443504	9.34131e-27
TICRR	SCN4A	0.166813	0.000121206
TICRR	ST7L	0.295894	4.33578e-12
TICRR	TKTL1	0.187431	1.5126e-05
TICRR	PAX6	0.156178	0.000323828
TICRR	RPUSD1	0.355	4.56057e-17
TICRR	RHBDF1	0.17697	4.47761e-05
TICRR	LUC7L	0.232609	6.80274e-08
TICRR	CACNA2D2	-0.348852	1.69182e-16
TICRR	TSR3	0.244261	1.38762e-08
TICRR	PIGQ	0.127305	0.00344826
TICRR	CRAMP1	0.368632	2.24648e-18
TICRR	TEAD3	0.327392	1.31781e-14
TICRR	DNAJC11	0.574506	1.59572e-47
TICRR	FMO3	-0.176728	4.58806e-05
TICRR	NOX1	0.0965266	0.0268486
TICRR	E2F2	0.834518	9.45085e-138
TICRR	PSMB1	0.343577	5.09358e-16
TICRR	SYN1	0.190567	1.0796e-05
TICRR	JARID2	0.533445	5.13472e-40
TICRR	CAMK1G	0.136361	0.00172087
TICRR	CDK11A	0.28411	3.18552e-11
TICRR	NADK	0.355112	4.45145e-17
TICRR	DLEC1	-0.137788	0.00153632
TICRR	CYTH3	0.0935491	0.0319432
TICRR	ADAM22	0.217927	4.48836e-07
TICRR	SYPL1	0.180893	3.00164e-05
TICRR	CYB561	0.192617	8.63387e-06
TICRR	SPAG9	0.192739	8.51896e-06
TICRR	CELSR3	0.505269	1.97586e-35
TICRR	AASS	0.0964194	0.027019
TICRR	PLEKHG6	0.393179	6.83486e-21
TICRR	SS18L2	0.229785	9.87683e-08
TICRR	MPND	0.140108	0.00127483
TICRR	CRY1	0.442633	1.20376e-26
TICRR	PGLYRP1	0.095996	0.0277016
TICRR	NFIX	-0.204597	2.23033e-06
TICRR	MMP25	0.243567	1.5291e-08
TICRR	IL32	0.184116	2.1475e-05
TICRR	PKD1	0.275154	1.36378e-10
TICRR	MAPK8IP2	0.307674	5.37868e-13
TICRR	MED24	0.496345	4.58125e-34
TICRR	RHOBTB2	-0.192094	9.14277e-06
TICRR	HEATR5B	0.402487	6.66286e-22
TICRR	SEC62	0.202801	2.74652e-06
TICRR	RPS20	0.140245	0.00126067
TICRR	CSDE1	0.35117	1.03567e-16
TICRR	UBE3C	0.497505	3.06024e-34
TICRR	REV3L	0.23604	4.29643e-08
TICRR	PAX7	-0.170877	8.19258e-05
TICRR	MASP2	0.137007	0.00163492
TICRR	IYD	-0.169445	9.41518e-05
TICRR	FAM76A	0.118068	0.00671018
TICRR	POMT2	0.453722	4.51516e-28
TICRR	VTA1	0.508994	5.17489e-36
TICRR	MLXIPL	0.187064	1.5729e-05
TICRR	BAZ1B	0.546935	2.27997e-42
TICRR	RANBP9	0.276277	1.13976e-10
TICRR	ETV7	0.252556	4.25389e-09
TICRR	SPRTN	0.446594	3.77785e-27
TICRR	METTL13	0.413009	4.38162e-23
TICRR	DYRK4	0.131191	0.00257234
TICRR	ZNF207	0.459256	8.38065e-29
TICRR	UQCRC1	0.303728	1.09363e-12
TICRR	STARD3NL	0.245688	1.1357e-08
TICRR	HHATL	-0.164683	0.000148303
TICRR	NCAPD2	0.770878	1.04121e-104
TICRR	IFFO1	0.185943	1.7717e-05
TICRR	PHF7	0.217885	4.51187e-07
TICRR	SEMA3G	0.13464	0.00197026
TICRR	NISCH	0.212678	8.5436e-07
TICRR	STAB1	0.288634	1.49764e-11
TICRR	FUZ	0.173154	6.55249e-05
TICRR	IDS	0.151419	0.00049289
TICRR	PRSS3	0.260788	1.2613e-09
TICRR	ZNF200	0.503804	3.33145e-35
TICRR	HFE	0.150934	0.000514071
TICRR	SCMH1	0.277133	9.9345e-11
TICRR	FYN	0.230977	8.44336e-08
TICRR	HIVEP2	0.390026	1.47918e-20
TICRR	FMO1	0.178447	3.85564e-05
TICRR	ELOA	0.233083	6.38699e-08
TICRR	LYPLA2	0.239963	2.5183e-08
TICRR	CLCN6	0.292416	7.88717e-12
TICRR	MRC2	0.157397	0.000290225
TICRR	NME1-NME2	0.319165	6.40319e-14
TICRR	SLC6A7	0.137771	0.00153843
TICRR	TSPAN9	0.140936	0.00119186
TICRR	BTBD7	0.35337	6.4743e-17
TICRR	APBA3	0.322599	3.3291e-14
TICRR	MKS1	0.384811	5.20834e-20
TICRR	ABHD5	0.298881	2.5772e-12
TICRR	ANOS1	-0.134984	0.00191791
TICRR	AKAP8L	0.426772	1.07378e-24
TICRR	MBTD1	0.454791	3.26879e-28
TICRR	UTP18	0.503518	3.68812e-35
TICRR	RNF216	0.501141	8.55577e-35
TICRR	PTBP1	0.591368	6.33336e-51
TICRR	DPF1	0.477715	2.42448e-31
TICRR	SYT7	0.229548	1.01877e-07
TICRR	LARS2	0.481831	6.2694e-32
TICRR	PIK3C2A	0.34454	4.172e-16
TICRR	PLAUR	0.269547	3.30083e-10
TICRR	ANLN	0.812237	9.32936e-125
TICRR	WIZ	0.488459	6.82958e-33
TICRR	RABGAP1	0.344891	3.87795e-16
TICRR	DCN	-0.143325	0.000979546
TICRR	QPCTL	0.243042	1.6451e-08
TICRR	PPP5C	0.398814	1.68459e-21
TICRR	CEP68	0.211352	1.0026e-06
TICRR	MAP4K3	0.400555	1.08675e-21
TICRR	ZBTB32	0.263754	8.05434e-10
TICRR	GABRA3	0.336032	2.37666e-15
TICRR	BRCA1	0.864388	1.40492e-158
TICRR	ERCC1	0.266224	5.52032e-10
TICRR	CD22	-0.0923648	0.034188
TICRR	MBTPS2	0.414902	2.65742e-23
TICRR	PRICKLE3	0.40757	1.81071e-22
TICRR	LTF	-0.12122	0.00537245
TICRR	EXTL3	0.33211	5.2068e-15
TICRR	ELOVL5	0.415128	2.50271e-23
TICRR	KDM5D	0.150483	0.000534549
TICRR	UBR7	0.42661	1.12296e-24
TICRR	MAP4K5	0.453956	4.20711e-28
TICRR	EHD3	0.394032	5.53961e-21
TICRR	PSMC4	0.470379	2.58274e-30
TICRR	MAN2B2	0.180698	3.06271e-05
TICRR	SLC25A39	0.432127	2.42069e-25
TICRR	NUB1	0.339351	1.21326e-15
TICRR	PGM3	0.50492	2.23832e-35
TICRR	RWDD2A	0.218521	4.16887e-07
TICRR	CLK1	0.150765	0.000521675
TICRR	POLR3B	0.457575	1.40246e-28
TICRR	ANGEL1	0.353796	5.90893e-17
TICRR	RNF14	0.148585	0.000629371
TICRR	DNASE1L1	0.214709	6.67255e-07
TICRR	DDX11	0.643004	1.06622e-62
TICRR	HEBP1	0.163206	0.000170319
TICRR	MAMLD1	0.173914	6.07776e-05
TICRR	CD6	0.126867	0.00356235
TICRR	TACC3	0.789771	2.6439e-113
TICRR	UFL1	0.268282	4.01797e-10
TICRR	POLA2	0.731938	2.344e-89
TICRR	ZC3H3	0.464784	1.51071e-29
TICRR	CAPN1	0.263717	8.10071e-10
TICRR	ACP3	0.116961	0.00724636
TICRR	MDH1	0.430227	4.11956e-25
TICRR	SLC30A9	0.260866	1.2467e-09
TICRR	MTMR11	0.336612	2.11463e-15
TICRR	COX15	0.362155	9.56294e-18
TICRR	CCDC88C	0.323156	2.9916e-14
TICRR	YAF2	0.334172	3.45229e-15
TICRR	ZMYND11	0.223619	2.19277e-07
TICRR	WAS	0.142083	0.00108511
TICRR	BID	0.397347	2.43189e-21
TICRR	NPC1L1	0.205232	2.07129e-06
TICRR	XYLT2	0.309154	4.10985e-13
TICRR	RGPD5	0.131585	0.0024958
TICRR	STMN4	0.0861132	0.0483876
TICRR	NUDCD3	0.310306	3.33015e-13
TICRR	ISL1	0.103661	0.0173978
TICRR	CHDH	0.0963712	0.027096
TICRR	IL20RA	0.0883537	0.0428153
TICRR	GLT8D1	0.257747	1.9863e-09
TICRR	ATP2C1	0.489797	4.34018e-33
TICRR	SLC38A5	0.129728	0.0028749
TICRR	RALBP1	0.46227	3.30553e-29
TICRR	RUFY3	0.204859	2.16323e-06
TICRR	CNTN1	0.0996965	0.0222093
TICRR	SLC11A1	0.221176	2.98914e-07
TICRR	WWTR1	0.166857	0.000120702
TICRR	AGPS	0.533042	6.01374e-40
TICRR	ZNF285CP	0.188309	1.37702e-05
TICRR	STEEP1	0.421559	4.46474e-24
TICRR	ATP1A2	-0.344429	4.26911e-16
TICRR	TTC27	0.500272	1.16178e-34
TICRR	VSIG2	-0.343087	5.63702e-16
TICRR	PHLDB1	0.248537	7.58436e-09
TICRR	CYP24A1	0.203848	2.43308e-06
TICRR	PRDM11	0.179833	3.34691e-05
TICRR	SYT13	0.173809	6.14146e-05
TICRR	SNAI2	0.268972	3.61016e-10
TICRR	CD74	-0.139686	0.00131911
TICRR	ZRANB1	0.43287	1.96413e-25
TICRR	NCDN	0.257784	1.97527e-09
TICRR	ADGRA2	0.199154	4.16752e-06
TICRR	CCT8L1P	0.130233	0.00276693
TICRR	ZFP64	0.529391	2.49473e-39
TICRR	MNAT1	0.420813	5.46266e-24
TICRR	SAMD4A	0.192612	8.63865e-06
TICRR	RUNX3	0.206277	1.8327e-06
TICRR	MRE11	0.540165	3.56311e-41
TICRR	SERPINB1	0.0927184	0.033504
TICRR	CYP3A43	0.103822	0.0172237
TICRR	SLC7A9	0.270845	2.69494e-10
TICRR	SPAST	0.480492	9.75452e-32
TICRR	OSBPL5	0.16143	0.000200851
TICRR	AQR	0.4389	3.53861e-26
TICRR	CPS1	0.236099	4.26214e-08
TICRR	C8B	-0.139164	0.00137584
TICRR	FHL1	-0.199197	4.14712e-06
TICRR	RTF2	0.352482	7.82896e-17
TICRR	GABRA1	0.108857	0.0124861
TICRR	NLRP2	0.0998821	0.0219607
TICRR	SLC45A4	0.323609	2.7424e-14
TICRR	RNF10	0.412656	4.8082e-23
TICRR	ZNF839	0.350863	1.1053e-16
TICRR	ZDHHC6	0.351359	9.94783e-17
TICRR	GRAMD1B	0.276388	1.11954e-10
TICRR	RNH1	0.118634	0.00645007
TICRR	NDUFS1	0.433089	1.84685e-25
TICRR	RB1CC1	0.382657	8.7029e-20
TICRR	ERP44	0.289585	1.2758e-11
TICRR	ALAS1	0.257636	2.01904e-09
TICRR	BIRC3	0.171406	7.77991e-05
TICRR	AKAP11	0.264041	7.71047e-10
TICRR	GLRX2	0.375084	5.1356e-19
TICRR	SNAPC1	0.39802	2.05525e-21
TICRR	DERA	0.337208	1.87455e-15
TICRR	STRAP	0.526753	6.89803e-39
TICRR	ABCC2	0.363316	7.39368e-18
TICRR	DEF6	0.21911	3.87392e-07
TICRR	PLEKHO1	0.29818	2.91358e-12
TICRR	GCLM	0.350212	1.26911e-16
TICRR	UBR2	0.351237	1.021e-16
TICRR	DEPDC1	0.816954	2.33563e-127
TICRR	RRAGD	0.270732	2.7431e-10
TICRR	HSF2	0.419413	7.96929e-24
TICRR	PHF20	0.477192	2.87544e-31
TICRR	HSD17B6	-0.291801	8.75868e-12
TICRR	NR1H3	0.206547	1.77538e-06
TICRR	TYMP	0.291806	8.75155e-12
TICRR	NCAPH2	0.349597	1.44572e-16
TICRR	TOMM34	0.445123	5.82018e-27
TICRR	SEC63	0.332958	4.39853e-15
TICRR	KPNA6	0.441951	1.46724e-26
TICRR	RTEL1-TNFRSF6B	0.366658	3.50577e-18
TICRR	RNASET2	0.153609	0.000406857
TICRR	KCNG1	0.287688	1.75555e-11
TICRR	AGPAT4	0.213284	7.93799e-07
TICRR	SLAMF7	0.127956	0.00328479
TICRR	BTN3A1	0.193035	8.24731e-06
TICRR	MIPEP	0.180599	3.09386e-05
TICRR	PRKCH	0.237955	3.31424e-08
TICRR	INSRR	0.287999	1.66633e-11
TICRR	B4GALT7	0.196658	5.5192e-06
TICRR	SH2D2A	0.428624	6.43426e-25
TICRR	VRK2	0.583016	3.24474e-49
TICRR	TNFRSF1B	0.144237	0.0009082
TICRR	VEZT	0.361993	9.91236e-18
TICRR	POU2F2	0.226121	1.59078e-07
TICRR	BRD9	0.475215	5.46529e-31
TICRR	SNX1	0.169587	9.28674e-05
TICRR	TBPL1	0.368695	2.21501e-18
TICRR	ARNTL2	0.491648	2.30934e-33
TICRR	BCLAF1	0.412884	4.52736e-23
TICRR	SLC39A9	0.3542	5.41762e-17
TICRR	ANK1	0.0975149	0.02532
TICRR	IBSP	0.169642	9.23738e-05
TICRR	TFB1M	0.252199	4.47989e-09
TICRR	RABEP1	0.332521	4.79849e-15
TICRR	HMGB3	0.35219	8.33293e-17
TICRR	NUP160	0.465726	1.12458e-29
TICRR	BAK1	0.324211	2.44193e-14
TICRR	MUSK	-0.150699	0.000524689
TICRR	IKZF2	0.181349	2.86375e-05
TICRR	GRN	0.197759	4.8782e-06
TICRR	FAM13B	0.10753	0.0136072
TICRR	CENPQ	0.503923	3.19305e-35
TICRR	SARS1	0.239197	2.79733e-08
TICRR	RANBP3	0.371195	1.25502e-18
TICRR	ARID4A	0.176016	4.92826e-05
TICRR	EIPR1	0.488962	5.76113e-33
TICRR	PNPLA6	0.31702	9.59395e-14
TICRR	IFT88	0.130728	0.0026647
TICRR	ALG1	0.106965	0.0141113
TICRR	ZCCHC8	0.554577	9.48631e-44
TICRR	ABCF2	0.492825	1.54367e-33
TICRR	CHPF2	0.33145	5.93429e-15
TICRR	LRRC7	0.3374	1.80333e-15
TICRR	FUT8	0.122051	0.00506254
TICRR	UBA6	0.597822	2.79247e-52
TICRR	GAB2	0.22908	1.08326e-07
TICRR	ATP6V0A1	0.205932	1.90839e-06
TICRR	PIAS1	0.328714	1.01749e-14
TICRR	SLC4A7	0.33934	1.21612e-15
TICRR	APBA2	0.249657	6.46151e-09
TICRR	MAP2K3	0.266584	5.22347e-10
TICRR	CLXN	-0.188251	1.3856e-05
TICRR	TMSB10	0.274676	1.47157e-10
TICRR	ASTE1	0.353316	6.54991e-17
TICRR	RNF19A	0.166647	0.000123142
TICRR	PEX3	0.27978	6.47707e-11
TICRR	MYOC	-0.269652	3.2473e-10
TICRR	SH3YL1	0.0878492	0.0440204
TICRR	FAM136A	0.628166	4.35774e-59
TICRR	VCL	0.369348	1.9103e-18
TICRR	DEPDC1B	0.779888	1.05969e-108
TICRR	DAPK2	-0.150651	0.000526836
TICRR	NSMAF	0.407845	1.6865e-22
TICRR	ADSS2	0.355836	3.80765e-17
TICRR	STAP1	-0.107474	0.0136571
TICRR	TIMP2	0.244953	1.2594e-08
TICRR	RFC1	0.487844	8.40525e-33
TICRR	TBC1D23	0.372871	8.55193e-19
TICRR	CUL3	0.37566	4.49433e-19
TICRR	MYOM2	-0.218375	4.24544e-07
TICRR	OTC	-0.321389	4.19595e-14
TICRR	ZZZ3	0.462864	2.74891e-29
TICRR	USP2	0.0895122	0.0401529
TICRR	CASR	-0.235445	4.65478e-08
TICRR	TUBG2	0.369207	1.97239e-18
TICRR	RPL26L1	0.228326	1.19524e-07
TICRR	FLT4	0.156951	0.000302119
TICRR	NSUN2	0.611951	2.33628e-55
TICRR	FBXO42	0.373966	6.64728e-19
TICRR	MFAP3	0.309263	4.02962e-13
TICRR	MRI1	0.240537	2.32726e-08
TICRR	METTL1	0.386395	3.5623e-20
TICRR	HOXC8	0.340125	1.03601e-15
TICRR	PI4K2B	0.202271	2.9194e-06
TICRR	BOD1L1	0.41594	2.01748e-23
TICRR	EDC4	0.46132	4.43606e-29
TICRR	TRIO	0.512389	1.50383e-36
TICRR	VCAN	0.379285	1.92957e-19
TICRR	CLEC16A	0.247683	8.56381e-09
TICRR	CDH1	0.228822	1.1203e-07
TICRR	MTREX	0.322606	3.32466e-14
TICRR	ZFYVE16	0.231388	7.99758e-08
TICRR	RIPOR1	0.296331	4.01972e-12
TICRR	C6	-0.253067	3.94981e-09
TICRR	RAI14	0.254039	3.428e-09
TICRR	SOX30	0.232714	6.70845e-08
TICRR	PNKP	0.403582	5.04229e-22
TICRR	BEST2	0.310428	3.25692e-13
TICRR	PHLPP2	0.503234	4.07942e-35
TICRR	SPDL1	0.715	1.71153e-83
TICRR	STAU2	0.307987	5.08169e-13
TICRR	SLC66A1	0.345432	3.46524e-16
TICRR	CTNS	0.249419	6.68627e-09
TICRR	RTN4R	0.182143	2.63788e-05
TICRR	PHF23	0.277161	9.89007e-11
TICRR	INPP4A	0.337985	1.60176e-15
TICRR	PSMA4	0.429842	4.58613e-25
TICRR	MYO16	0.141852	0.00110585
TICRR	LSG1	0.623726	4.81199e-58
TICRR	TNC	0.211556	9.78314e-07
TICRR	THAP3	0.181247	2.89412e-05
TICRR	RIPOR3	0.455487	2.64744e-28
TICRR	TDP1	0.547685	1.67521e-42
TICRR	AIFM2	0.313045	2.01191e-13
TICRR	C2orf83	0.231721	7.65217e-08
TICRR	SPATA7	0.170324	8.64568e-05
TICRR	MED17	0.441728	1.56552e-26
TICRR	RETSAT	0.126518	0.00365585
TICRR	CAPG	0.103384	0.0177018
TICRR	AP2S1	0.390812	1.22133e-20
TICRR	USH2A	0.172237	7.17169e-05
TICRR	ZPBP	-0.157848	0.000278642
TICRR	TG	0.283894	3.30093e-11
TICRR	ADAM28	0.0886424	0.0421383
TICRR	DCUN1D1	0.498202	2.39966e-34
TICRR	JADE2	0.128996	0.00303827
TICRR	ZIC2	0.27272	2.0067e-10
TICRR	LCP2	0.174949	5.48342e-05
TICRR	TRIT1	0.475365	5.20632e-31
TICRR	ADRB1	-0.158798	0.00025563
TICRR	GUCA2B	0.121357	0.00532034
TICRR	CUL7	0.408255	1.51676e-22
TICRR	CTNNA1	0.223684	2.17467e-07
TICRR	PHKA2	0.366722	3.45542e-18
TICRR	CNTLN	0.36948	1.85404e-18
TICRR	EPHA3	-0.175715	5.07907e-05
TICRR	HSPA5	0.323339	2.8884e-14
TICRR	DSG2	0.416255	1.85541e-23
TICRR	GEMIN8	0.105819	0.0151832
TICRR	OFD1	0.251259	5.13198e-09
TICRR	MAGEC2	0.357098	2.89662e-17
TICRR	PREX2	-0.10316	0.0179504
TICRR	WDR37	0.27643	1.11208e-10
TICRR	YTHDC2	0.253698	3.60276e-09
TICRR	CTPS2	0.337254	1.85716e-15
TICRR	ATP6V1H	0.280954	5.34927e-11
TICRR	POLR2B	0.504535	2.56815e-35
TICRR	FAM214A	0.161263	0.000203958
TICRR	ARAP2	0.15412	0.0003889
TICRR	TPR	0.493247	1.33545e-33
TICRR	CP	0.126586	0.0036374
TICRR	KATNIP	0.347223	2.38329e-16
TICRR	DTNBP1	0.269415	3.36917e-10
TICRR	C12orf4	0.435195	1.01855e-25
TICRR	SCML1	0.284177	3.15021e-11
TICRR	WWC3	0.115631	0.00794141
TICRR	ARHGAP6	-0.114776	0.00841842
TICRR	FAM184B	0.116167	0.00765446
TICRR	MAP4	0.377617	2.8511e-19
TICRR	GOPC	0.465029	1.39929e-29
TICRR	ROS1	-0.254605	3.15578e-09
TICRR	USP28	0.449167	1.76474e-27
TICRR	HDAC9	0.120464	0.00566958
TICRR	TSPAN17	0.222501	2.52796e-07
TICRR	NOP16	0.367587	2.84455e-18
TICRR	RRM2B	-0.0890686	0.0411555
TICRR	ZNF800	0.318801	6.85885e-14
TICRR	SNX29	0.100991	0.0205248
TICRR	LMO3	-0.272528	2.06842e-10
TICRR	MRPS10	0.442314	1.32054e-26
TICRR	GUCA1A	0.447522	2.8728e-27
TICRR	RSF1	0.470381	2.58102e-30
TICRR	VPS13D	0.180523	3.11826e-05
TICRR	CELF2	-0.150014	0.000556685
TICRR	FAM120A	0.352995	7.0158e-17
TICRR	R3HDM1	0.733162	8.48952e-90
TICRR	COL9A2	0.112748	0.00965529
TICRR	ERCC8	0.331068	6.40015e-15
TICRR	ADAMTS6	0.440636	2.14682e-26
TICRR	H6PD	0.250398	5.80959e-09
TICRR	VAMP3	0.165709	0.000134614
TICRR	TNFRSF9	0.26342	8.47451e-10
TICRR	EPN3	0.321799	3.87999e-14
TICRR	LTBP1	0.230852	8.58311e-08
TICRR	RCN1	0.380771	1.36017e-19
TICRR	ELN	-0.233775	5.82363e-08
TICRR	RFC2	0.558595	1.72446e-44
TICRR	ARID1B	0.383215	7.62205e-20
TICRR	CLPTM1L	0.176793	4.5579e-05
TICRR	FOXP3	0.232087	7.28986e-08
TICRR	PPP1R3F	0.177392	4.29089e-05
TICRR	HEXB	0.108153	0.0130704
TICRR	PTCD2	0.323515	2.79217e-14
TICRR	NEXMIF	-0.270706	2.75439e-10
TICRR	JKAMP	0.261849	1.07497e-09
TICRR	ARHGEF5	0.36393	6.45013e-18
TICRR	NFE2L3	0.143336	0.00097867
TICRR	MCUR1	0.293425	6.63534e-12
TICRR	LIMA1	0.24868	7.43118e-09
TICRR	LETMD1	0.205747	1.95018e-06
TICRR	SLC4A8	0.19077	1.0561e-05
TICRR	LAMC3	0.1253	0.00399902
TICRR	TNIP3	0.241208	2.12154e-08
TICRR	MAPK9	0.187586	1.48772e-05
TICRR	COL23A1	0.160401	0.000220812
TICRR	BCAR1	0.333123	4.25647e-15
TICRR	FHIP1B	0.23033	9.19471e-08
TICRR	HOMER3	0.395958	3.43737e-21
TICRR	RAD51	0.813869	1.19708e-125
TICRR	POLQ	0.893859	1.08977e-184
TICRR	PIK3CB	0.380906	1.31736e-19
TICRR	CYBA	0.0913251	0.0362683
TICRR	THOC3	0.432834	1.98442e-25
TICRR	HEBP2	0.348387	1.86599e-16
TICRR	MPHOSPH9	0.64068	4.04216e-62
TICRR	PLEKHA5	0.361392	1.13188e-17
TICRR	SIKE1	0.441892	1.49257e-26
TICRR	RRP12	0.500268	1.16344e-34
TICRR	MSMO1	0.199179	4.15574e-06
TICRR	TTC17	0.295485	4.65429e-12
TICRR	ALX4	0.140482	0.0012367
TICRR	FOXN3	0.205289	2.05737e-06
TICRR	METTL24	0.0918379	0.0352292
TICRR	AKR7A2	0.173954	6.05398e-05
TICRR	MRTO4	0.433414	1.68529e-25
TICRR	NNAT	0.243988	1.44168e-08
TICRR	USE1	0.1612	0.000205159
TICRR	MCF2L2	0.574717	1.45106e-47
TICRR	LAMA3	0.123173	0.00466951
TICRR	AP5M1	0.371388	1.2008e-18
TICRR	ANAPC4	0.343043	5.68824e-16
TICRR	KCNQ1	-0.166954	0.000119587
TICRR	TRAPPC3	0.240102	2.47054e-08
TICRR	THRAP3	0.4699	3.00877e-30
TICRR	ENTPD2	0.214311	7.00515e-07
TICRR	LY75	0.143999	0.00092632
TICRR	ARID4B	0.317655	8.5142e-14
TICRR	OPN3	0.295427	4.70116e-12
TICRR	PTPRN	0.412543	4.95268e-23
TICRR	KIF1B	0.441092	1.88181e-26
TICRR	FOXC1	0.279983	6.26643e-11
TICRR	TBC1D22A	0.228787	1.12551e-07
TICRR	SYNE2	0.291272	9.585e-12
TICRR	PLEKHH1	0.454621	3.44165e-28
TICRR	ATP9A	0.183793	2.22139e-05
TICRR	SPO11	0.132893	0.00225689
TICRR	CBLN4	-0.122387	0.00494188
TICRR	FAM168A	0.510925	2.56716e-36
TICRR	RELT	0.496377	4.53153e-34
TICRR	GALC	0.124115	0.00436099
TICRR	NOP58	0.594335	1.52127e-51
TICRR	SZRD1	0.363063	7.82146e-18
TICRR	CUL1	0.417906	1.19414e-23
TICRR	FAM114A2	0.11266	0.00971188
TICRR	CYFIP2	-0.126327	0.00370779
TICRR	TAB2	0.374592	5.75419e-19
TICRR	GINM1	0.207454	1.59555e-06
TICRR	EIF2AK2	0.541605	1.99664e-41
TICRR	USP36	0.515767	4.33783e-37
TICRR	KMT2C	0.339497	1.17769e-15
TICRR	MCOLN3	0.26508	6.57955e-10
TICRR	PUM2	0.412024	5.67638e-23
TICRR	MRPL43	0.15435	0.00038108
TICRR	ITIH4	0.1393	0.00136082
TICRR	HPF1	0.270411	2.88442e-10
TICRR	ZFR	0.499227	1.67696e-34
TICRR	ZNF280C	0.462064	3.52329e-29
TICRR	NPFFR2	0.246367	1.03196e-08
TICRR	PHF21B	0.116517	0.00747214
TICRR	TRAF1	0.190701	1.06406e-05
TICRR	RC3H2	0.505227	2.00618e-35
TICRR	IL17RB	0.201612	3.14914e-06
TICRR	TRAF3IP2	0.242395	1.7999e-08
TICRR	GYG2	0.15579	0.000335244
TICRR	DCBLD2	0.302025	1.48058e-12
TICRR	SERPINB3	0.163542	0.000165048
TICRR	SOAT1	0.292668	7.55466e-12
TICRR	PKP2	0.382545	8.93923e-20
TICRR	MSH4	0.293299	6.78031e-12
TICRR	F7	0.281984	4.51967e-11
TICRR	GDI2	0.352573	7.67875e-17
TICRR	PRDM1	0.250217	5.96332e-09
TICRR	ATG5	0.328646	1.03113e-14
TICRR	TMCC3	0.255593	2.72982e-09
TICRR	PITHD1	0.252916	4.03727e-09
TICRR	MTA3	0.506714	1.17738e-35
TICRR	USP13	0.277125	9.94625e-11
TICRR	ATP11B	0.466779	8.07839e-30
TICRR	LAMC2	0.288124	1.63168e-11
TICRR	CDK14	0.0969253	0.0262226
TICRR	SEC61A1	0.499036	1.79275e-34
TICRR	PPP1R12A	0.529456	2.43303e-39
TICRR	RASGRF1	-0.202718	2.77282e-06
TICRR	CAMK2B	0.237326	3.61001e-08
TICRR	CROCC	0.181472	2.82769e-05
TICRR	POLR3E	0.392718	7.65622e-21
TICRR	ATP2B4	0.153854	0.00039816
TICRR	ZC3H11A	0.377116	3.20404e-19
TICRR	RIOK2	0.191271	1.00015e-05
TICRR	YIPF1	0.245777	1.12157e-08
TICRR	NDC1	0.71974	4.32903e-85
TICRR	DGKG	0.271452	2.44998e-10
TICRR	FLYWCH1	0.222095	2.66157e-07
TICRR	UNKL	0.372624	9.0499e-19
TICRR	PARP12	0.46025	6.17217e-29
TICRR	ALDH18A1	0.446082	4.39216e-27
TICRR	TARBP1	0.305813	7.52615e-13
TICRR	GATB	0.343136	5.57942e-16
TICRR	MXD1	0.42907	5.68392e-25
TICRR	CDK17	0.445137	5.79545e-27
TICRR	DNAJC25	0.388742	2.02116e-20
TICRR	SLC2A3	0.308935	4.27739e-13
TICRR	PSD	0.107046	0.0140381
TICRR	CTDP1	0.390661	1.26712e-20
TICRR	YBX3	0.355705	3.91655e-17
TICRR	STYK1	0.391475	1.03857e-20
TICRR	WNK1	0.260171	1.38361e-09
TICRR	CCAR1	0.584339	1.75303e-49
TICRR	OGFR	0.369442	1.87014e-18
TICRR	GNA15	0.133787	0.00210573
TICRR	CREB3L3	0.228585	1.15555e-07
TICRR	PIGV	0.15199	0.000468937
TICRR	SNRNP40	0.442311	1.32184e-26
TICRR	COL11A1	0.379641	1.77479e-19
TICRR	QSER1	0.536682	1.43121e-40
TICRR	BCAT1	0.100308	0.0213986
TICRR	HDAC7	0.346074	3.0307e-16
TICRR	LZTS1	0.334159	3.46107e-15
TICRR	PRDM6	-0.160979	0.000209381
TICRR	SPAG4	0.323245	2.94126e-14
TICRR	NCKAP1	0.447309	3.05941e-27
TICRR	MRPS35	0.469096	3.88445e-30
TICRR	SFSWAP	0.562168	3.71262e-45
TICRR	TNK2	0.35504	4.52124e-17
TICRR	MON2	0.39834	1.89711e-21
TICRR	CDH3	0.292319	8.01783e-12
TICRR	GPBP1	0.296888	3.64923e-12
TICRR	DGAT2	0.211502	9.84666e-07
TICRR	ZNF112	0.345231	3.61333e-16
TICRR	CS	0.561018	6.09783e-45
TICRR	LTK	0.144288	0.000904314
TICRR	MRPS24	0.300522	1.93139e-12
TICRR	ELMO2	0.327438	1.30584e-14
TICRR	WAPL	0.480871	8.60831e-32
TICRR	VMP1	0.338594	1.41541e-15
TICRR	APPBP2	0.332886	4.46226e-15
TICRR	POLD1	0.561998	3.99506e-45
TICRR	SEZ6	0.185407	1.87495e-05
TICRR	EIF4B	0.275823	1.22564e-10
TICRR	SLC6A16	0.14471	0.000873092
TICRR	BICRA	0.38356	7.02247e-20
TICRR	SPHK2	0.315636	1.24301e-13
TICRR	RPL18	0.13077	0.00265634
TICRR	CA11	0.120797	0.005537
TICRR	ISOC2	0.208554	1.40073e-06
TICRR	U2AF2	0.506251	1.39016e-35
TICRR	EPN1	0.387188	2.94319e-20
TICRR	MED29	0.212626	8.59793e-07
TICRR	AHRR	0.378532	2.30179e-19
TICRR	GSC2	0.18023	3.21362e-05
TICRR	ZNF275	0.28888	1.43687e-11
TICRR	MTMR1	0.410814	7.79132e-23
TICRR	GPC1	0.213321	7.90273e-07
TICRR	ADCK1	0.299765	2.20691e-12
TICRR	RNF4	0.506432	1.30301e-35
TICRR	CASP8	0.320795	4.69937e-14
TICRR	INTS13	0.596359	5.70089e-52
TICRR	TM7SF3	0.165676	0.000135026
TICRR	DLX3	-0.136917	0.00164666
TICRR	DMRT3	0.192105	9.13138e-06
TICRR	CDON	0.156348	0.000318935
TICRR	TAF2	0.58786	3.35597e-50
TICRR	HIPK2	0.306733	6.37616e-13
TICRR	TNPO3	0.589755	1.3669e-50
TICRR	BORCS8-MEF2B	0.372568	9.16596e-19
TICRR	RFXANK	0.236865	3.84287e-08
TICRR	TMEM161A	0.312054	2.4161e-13
TICRR	LPAR2	0.353991	5.6671e-17
TICRR	CTSA	0.288377	1.56372e-11
TICRR	SUGP2	0.473613	9.16679e-31
TICRR	SLC12A2	0.205202	2.07843e-06
TICRR	SNX24	0.18289	2.4409e-05
TICRR	EYA2	0.244975	1.25555e-08
TICRR	CNN2	0.217067	4.99289e-07
TICRR	ABCA7	0.275737	1.24244e-10
TICRR	SNCAIP	0.135736	0.00180782
TICRR	DDX20	0.435912	8.30987e-26
TICRR	BTBD1	0.402068	7.41074e-22
TICRR	FAR2	0.20944	1.2607e-06
TICRR	POU1F1	-0.0906733	0.0376264
TICRR	CHI3L2	-0.19297	8.30654e-06
TICRR	SBNO2	0.439624	2.87416e-26
TICRR	PMS1	0.524052	1.93667e-38
TICRR	HMG20B	0.370025	1.63827e-18
TICRR	CALCRL	-0.101957	0.0193413
TICRR	TAF11	0.482677	4.73789e-32
TICRR	ANKS1A	0.392022	9.0835e-21
TICRR	AP3D1	0.480711	9.07663e-32
TICRR	ZNF76	0.276079	1.17632e-10
TICRR	NTHL1	0.148891	0.000613089
TICRR	UHRF1BP1	0.503497	3.71629e-35
TICRR	GNAI3	0.476356	3.77466e-31
TICRR	IPO5	0.464812	1.49759e-29
TICRR	OAT	0.132828	0.00226829
TICRR	WDR3	0.527231	5.74072e-39
TICRR	PKN2	0.498944	1.85136e-34
TICRR	WDR18	0.3939	5.7231e-21
TICRR	TRAM2	0.472412	1.34874e-30
TICRR	NTN1	0.178649	3.7773e-05
TICRR	MCM10	0.86198	1.011e-156
TICRR	DGKA	0.280828	5.46061e-11
TICRR	ERBB3	0.117139	0.0071577
TICRR	ROPN1	0.118027	0.00672933
TICRR	ANKRD44	-0.105619	0.0153775
TICRR	KARS1	0.420542	5.87752e-24
TICRR	ADAT1	0.355352	4.22764e-17
TICRR	PDIA5	0.377606	2.85846e-19
TICRR	TBC1D22B	0.405569	3.0325e-22
TICRR	NDUFB4	0.346302	2.88976e-16
TICRR	SPEN	0.425439	1.54937e-24
TICRR	ZC3H15	0.534051	4.04675e-40
TICRR	MAP2K4	0.299133	2.4659e-12
TICRR	PACC1	0.582021	5.14759e-49
TICRR	SNAP91	0.0985539	0.0237945
TICRR	SLK	0.346478	2.78543e-16
TICRR	CYB5R4	0.226944	1.43033e-07
TICRR	GSTO2	0.0942033	0.030758
TICRR	SEC61A2	0.550989	4.26394e-43
TICRR	ASB1	0.454988	3.08018e-28
TICRR	FAM107B	0.112427	0.0098647
TICRR	ME1	0.248186	7.9726e-09
TICRR	TBC1D1	0.47652	3.57938e-31
TICRR	CDK13	0.465375	1.25558e-29
TICRR	MTHFD2	0.662141	1.15844e-67
TICRR	SLC9A7	0.375638	4.51698e-19
TICRR	FOXJ2	0.329689	8.40127e-15
TICRR	YBX1	0.461345	4.40151e-29
TICRR	PDE4A	0.0987824	0.0234699
TICRR	ELAVL1	0.571635	5.79021e-47
TICRR	DIP2B	0.599366	1.30988e-52
TICRR	SMARCD1	0.609948	6.51795e-55
TICRR	KDM4A	0.422197	3.75507e-24
TICRR	NFYC	0.310393	3.27766e-13
TICRR	ZMYND12	-0.190149	1.12959e-05
TICRR	SLC9A3	0.217522	4.71977e-07
TICRR	NGEF	0.3039	1.06059e-12
TICRR	ASPM	0.871514	2.73014e-164
TICRR	CD84	0.114198	0.00875573
TICRR	ELOVL1	0.160766	0.000213528
TICRR	SPI1	0.0913886	0.0361383
TICRR	POLR1H	0.254626	3.146e-09
TICRR	CLDN18	-0.227892	1.26469e-07
TICRR	ZBTB11	0.421491	4.54683e-24
TICRR	ATXN3	0.32435	2.37749e-14
TICRR	GOLGA5	0.415538	2.24496e-23
TICRR	FGFR2	-0.0974964	0.0253478
TICRR	LRRC40	0.472454	1.33066e-30
TICRR	ISOC1	0.238647	3.01575e-08
TICRR	TRMT11	0.430637	3.6734e-25
TICRR	THUMPD1	0.209044	1.32153e-06
TICRR	MSANTD3	0.498243	2.36567e-34
TICRR	KIF26A	0.0973413	0.025583
TICRR	ATG2B	0.302868	1.27481e-12
TICRR	ARFGEF1	0.351192	1.03065e-16
TICRR	ZFAT	0.379773	1.72029e-19
TICRR	MTFR1	0.433489	1.65016e-25
TICRR	STAG3	0.369029	2.05349e-18
TICRR	FECH	0.320802	4.69261e-14
TICRR	MYO9A	0.160799	0.000212877
TICRR	DDX3Y	0.146266	0.000766257
TICRR	PFKP	0.51676	3.00249e-37
TICRR	IDI1	0.236341	4.12508e-08
TICRR	SP100	0.236768	3.89348e-08
TICRR	KLF6	0.177747	4.13931e-05
TICRR	PLPP1	0.134135	0.00204941
TICRR	NEO1	0.170699	8.33636e-05
TICRR	PHKA1	0.44275	1.16353e-26
TICRR	TNFRSF1A	0.251863	4.70324e-09
TICRR	EVI5	0.214471	6.86978e-07
TICRR	STOML1	0.123641	0.00451379
TICRR	PKM	0.406669	2.28512e-22
TICRR	DHX29	0.250665	5.59127e-09
TICRR	DNTTIP2	0.477814	2.34779e-31
TICRR	METTL22	0.426107	1.28972e-24
TICRR	TP53BP1	0.464218	1.8028e-29
TICRR	TRO	0.328534	1.05393e-14
TICRR	RRP15	0.445573	5.10031e-27
TICRR	RHOA	0.189775	1.17622e-05
TICRR	DHX8	0.51441	7.16133e-37
TICRR	PMS2P4	0.220142	3.40438e-07
TICRR	ZFY	0.134937	0.00192496
TICRR	IARS2	0.403843	4.71716e-22
TICRR	SYT1	0.352469	7.8513e-17
TICRR	NAV3	0.112117	0.0100711
TICRR	IDH3G	0.312115	2.38879e-13
TICRR	ATP2B3	0.11474	0.00843945
TICRR	ROCK1	0.410248	9.03386e-23
TICRR	CBFB	0.364849	5.25609e-18
TICRR	PDK3	0.417855	1.21042e-23
TICRR	HYAL2	0.167415	0.000114438
TICRR	HDAC4	0.417662	1.27457e-23
TICRR	RASSF1	0.270183	2.989e-10
TICRR	FGFR3	-0.105656	0.0153421
TICRR	IFI35	0.282091	4.44132e-11
TICRR	HEATR6	0.503975	3.13547e-35
TICRR	COASY	0.454567	3.49821e-28
TICRR	PLEKHH3	0.306549	6.59231e-13
TICRR	MEF2A	0.284924	2.78381e-11
TICRR	OTUD5	0.322764	3.22542e-14
TICRR	TFE3	0.363251	7.50156e-18
TICRR	TBC1D25	0.264451	7.24311e-10
TICRR	ACSL4	0.211888	9.39899e-07
TICRR	INPP5A	0.191671	9.57479e-06
TICRR	GPKOW	0.396291	3.16402e-21
TICRR	GRIPAP1	0.408803	1.31578e-22
TICRR	FTSJ1	0.446153	4.30164e-27
TICRR	PRR11	0.846812	8.81656e-146
TICRR	POLR1A	0.5972	3.78533e-52
TICRR	LAPTM4A	0.119951	0.00587934
TICRR	TTC7A	0.340768	9.0832e-16
TICRR	IP6K2	0.265358	6.3052e-10
TICRR	STON1-GTF2A1L	0.123714	0.00449012
TICRR	SRBD1	0.413369	3.98488e-23
TICRR	KIF2A	0.490721	3.16918e-33
TICRR	PSME4	0.642508	1.41866e-62
TICRR	IFT80	0.146665	0.00074092
TICRR	SIRT2	0.181884	2.70983e-05
TICRR	ERLEC1	0.124908	0.00411557
TICRR	PPP2R5B	0.302831	1.28317e-12
TICRR	PAGE1	0.236091	4.26694e-08
TICRR	PITX1	0.297694	3.1711e-12
TICRR	TRPC7	0.143191	0.000990454
TICRR	ADGRF5	-0.313525	1.84099e-13
TICRR	NUP133	0.41088	7.65966e-23
TICRR	NUCKS1	0.402264	7.0509e-22
TICRR	VPS35	0.339659	1.13951e-15
TICRR	DNAJA2	0.259975	1.42489e-09
TICRR	BCL3	0.325072	2.06819e-14
TICRR	KCNAB2	0.205187	2.08218e-06
TICRR	GAL	0.432618	2.10896e-25
TICRR	CLEC2D	0.129417	0.00294329
TICRR	FUNDC1	0.235715	4.4889e-08
TICRR	MAOB	-0.169811	9.08701e-05
TICRR	DRD4	0.297847	3.08795e-12
TICRR	PLA2G10	-0.337756	1.6779e-15
TICRR	HES2	0.200209	3.69665e-06
TICRR	ATP1B3	0.521913	4.35711e-38
TICRR	NEDD4	0.37019	1.57777e-18
TICRR	PIGB	0.200048	3.7653e-06
TICRR	MAPK6	0.574014	1.99164e-47
TICRR	GNB5	0.306762	6.34351e-13
TICRR	RAB27A	-0.104009	0.0170226
TICRR	HDHD5	0.371627	1.13709e-18
TICRR	UFD1	0.479212	1.48581e-31
TICRR	LRP6	0.216798	5.1617e-07
TICRR	GUCY2C	0.180923	2.9926e-05
TICRR	SCT	0.170388	8.5921e-05
TICRR	PHRF1	0.42654	1.14474e-24
TICRR	ELP1	0.46303	2.61078e-29
TICRR	NUCB2	0.11616	0.007658
TICRR	PFN2	0.499539	1.50316e-34
TICRR	PTPN3	0.247905	8.29871e-09
TICRR	SPTB	0.132924	0.00225152
TICRR	DAPP1	0.130636	0.00268343
TICRR	FGF10	-0.206992	1.68498e-06
TICRR	SLC44A1	0.421312	4.77364e-24
TICRR	TMEM260	0.365822	4.22883e-18
TICRR	SMG6	0.294235	5.77335e-12
TICRR	EXOC5	0.492643	1.64295e-33
TICRR	CLTCL1	0.506393	1.321e-35
TICRR	FGF22	0.137657	0.00155251
TICRR	FSTL3	0.121173	0.00539061
TICRR	DGCR2	0.258908	1.67126e-09
TICRR	RNF126	0.425685	1.44816e-24
TICRR	MNT	0.412087	5.58296e-23
TICRR	ZXDC	0.333352	4.06681e-15
TICRR	JMJD6	0.490145	3.85583e-33
TICRR	POLB	0.249354	6.74836e-09
TICRR	ST6GALNAC1	-0.095541	0.0284514
TICRR	WIPI1	0.373615	7.20656e-19
TICRR	FRMPD1	0.227484	1.33353e-07
TICRR	GBA2	0.377342	3.03976e-19
TICRR	NDST1	0.274844	1.43277e-10
TICRR	ASNS	0.529154	2.73462e-39
TICRR	AP3M2	0.406871	2.16871e-22
TICRR	CNGB1	0.107872	0.0133105
TICRR	PABPC1	0.36323	7.53656e-18
TICRR	TESK2	0.230211	9.33881e-08
TICRR	CFAP20	0.321129	4.40992e-14
TICRR	CSNK2A2	0.512684	1.35025e-36
TICRR	EIF2B3	0.358157	2.30034e-17
TICRR	TCOF1	0.59361	2.15907e-51
TICRR	CDC42	0.153955	0.000394625
TICRR	OSBPL3	0.330964	6.53303e-15
TICRR	EPHA8	0.218058	4.41618e-07
TICRR	SLC12A3	0.175229	5.33241e-05
TICRR	RAD18	0.572725	3.555e-47
TICRR	ATP2B1	0.503389	3.86155e-35
TICRR	TRPM5	0.163041	0.000172952
TICRR	NCK2	0.36415	6.14187e-18
TICRR	MAP4K4	0.488117	7.667e-33
TICRR	MGAT4A	0.303968	1.04769e-12
TICRR	WDR1	0.383751	6.70943e-20
TICRR	SNX13	0.213161	8.05801e-07
TICRR	ARHGAP10	0.283969	3.26045e-11
TICRR	RPS6KA2	-0.0981741	0.0243426
TICRR	ING3	0.279961	6.28908e-11
TICRR	VASH1	0.240226	2.42876e-08
TICRR	BUD23	0.327704	1.23972e-14
TICRR	SEL1L	0.331322	6.08683e-15
TICRR	TRIP13	0.76461	4.8814e-102
TICRR	ATP6AP1	0.30031	2.00485e-12
TICRR	TCF3	0.582698	3.76128e-49
TICRR	TRIB2	0.238829	2.94161e-08
TICRR	DAZAP1	0.575555	9.93269e-48
TICRR	MBD3	0.409658	1.05356e-22
TICRR	PRLH	-0.0977485	0.0249699
TICRR	HLTF	0.606977	2.94744e-54
TICRR	FAM50A	0.355665	3.95124e-17
TICRR	FAM3A	0.185453	1.86571e-05
TICRR	CPSF1	0.44927	1.71146e-27
TICRR	MYO3B	0.180943	2.98626e-05
TICRR	CYBRD1	-0.284554	2.9598e-11
TICRR	PDCD2	0.377649	2.82963e-19
TICRR	SLC6A15	0.367443	2.93827e-18
TICRR	RDH11	0.464409	1.6983e-29
TICRR	PRKACA	0.340252	1.00949e-15
TICRR	ADGRL1	0.221767	2.77417e-07
TICRR	ACTN1	0.520544	7.30047e-38
TICRR	ZFYVE26	0.418276	1.08133e-23
TICRR	RPS6KA6	0.0986775	0.0236185
TICRR	EPN2	0.288377	1.56395e-11
TICRR	PTPN18	0.213321	7.90216e-07
TICRR	ASIC4	0.209911	1.19169e-06
TICRR	SPEG	0.162139	0.000188081
TICRR	LNX1	0.157704	0.00028229
TICRR	TFRC	0.562592	3.08994e-45
TICRR	SREBF1	0.29956	2.28774e-12
TICRR	AFF4	0.288441	1.54698e-11
TICRR	UBE2D1	0.439	3.43867e-26
TICRR	PALS1	0.274126	1.60623e-10
TICRR	RHOBTB1	0.28387	3.31419e-11
TICRR	SMC1A	0.58559	9.76487e-50
TICRR	HSD17B10	0.367459	2.92783e-18
TICRR	MARK2	0.523944	2.01796e-38
TICRR	HMMR	0.717496	2.49302e-84
TICRR	CHFR	0.58989	1.28165e-50
TICRR	TRHDE	-0.139565	0.0013321
TICRR	P4HA2	0.230969	8.45163e-08
TICRR	NFATC3	0.19964	3.94383e-06
TICRR	TRNT1	0.285152	2.68039e-11
TICRR	ACADVL	0.172818	6.77319e-05
TICRR	STK10	0.266234	5.51203e-10
TICRR	FBXW11	0.198914	4.28207e-06
TICRR	ACAP1	0.130435	0.00272486
TICRR	CRMP1	0.209062	1.31875e-06
TICRR	EVC	0.233495	6.0454e-08
TICRR	DERL2	0.251897	4.68008e-09
TICRR	SIDT1	0.116208	0.00763266
TICRR	NDE1	0.485281	1.98918e-32
TICRR	TMEM38A	0.252005	4.60761e-09
TICRR	AP1M1	0.307664	5.38793e-13
TICRR	PVR	0.549023	9.64103e-43
TICRR	XRCC1	0.376412	3.77449e-19
TICRR	SCARB1	0.482305	5.35878e-32
TICRR	CYP2W1	0.196787	5.44037e-06
TICRR	MCM2	0.780073	8.72945e-109
TICRR	MOV10L1	0.274079	1.61827e-10
TICRR	PANX2	0.198472	4.50177e-06
TICRR	SELENOO	0.281297	5.05795e-11
TICRR	ALPK1	0.200278	3.66782e-06
TICRR	LLGL2	0.204855	2.16422e-06
TICRR	PDE8A	0.236246	4.17811e-08
TICRR	CLCN4	0.273456	1.78607e-10
TICRR	NLE1	0.50637	1.33205e-35
TICRR	SDHA	0.42447	2.02083e-24
TICRR	SMARCE1	0.361918	1.00772e-17
TICRR	FNDC8	0.332657	4.66999e-15
TICRR	GSDMB	0.193257	8.04854e-06
TICRR	KDM5A	0.465701	1.13337e-29
TICRR	ADAM11	0.4038	4.76914e-22
TICRR	PPP2R3A	0.196904	5.36932e-06
TICRR	FERMT2	0.258499	1.77607e-09
TICRR	ABCB11	0.112056	0.0101123
TICRR	PTGS2	0.179898	3.32496e-05
TICRR	IGF2BP2	0.511392	2.16515e-36
TICRR	MAP3K13	0.307308	5.74712e-13
TICRR	ST6GAL1	0.107346	0.0137698
TICRR	TBX21	0.173591	6.27533e-05
TICRR	VDAC1P1	0.243707	1.49945e-08
TICRR	FRY	-0.107633	0.0135177
TICRR	PICALM	0.463905	1.988e-29
TICRR	NSF	0.42969	4.78444e-25
TICRR	GLI2	0.186371	1.69301e-05
TICRR	CLASP1	0.522333	3.71742e-38
TICRR	MRPS34	0.25311	3.92518e-09
TICRR	NOTCH3	0.426277	1.23069e-24
TICRR	CLNS1A	0.456039	2.23926e-28
TICRR	PPP2R2C	0.172113	7.25942e-05
TICRR	TEAD2	0.1911	1.01891e-05
TICRR	EED	0.561663	4.61686e-45
TICRR	CDHR2	0.249064	7.03381e-09
TICRR	SNCB	0.210644	1.09163e-06
TICRR	TSG101	0.256825	2.27658e-09
TICRR	NCBP3	0.421089	5.06957e-24
TICRR	ATP2A3	0.266082	5.64288e-10
TICRR	CA12	0.216864	5.11981e-07
TICRR	MGLL	-0.177518	4.23616e-05
TICRR	BCS1L	0.394303	5.18061e-21
TICRR	NUAK1	0.296011	4.2491e-12
TICRR	DPP8	0.383137	7.76506e-20
TICRR	SLC24A1	0.319658	5.83275e-14
TICRR	ZNF532	0.492819	1.54662e-33
TICRR	LMAN1	0.477833	2.33328e-31
TICRR	HACD3	0.320599	4.87773e-14
TICRR	ZZEF1	0.341236	8.25199e-16
TICRR	NOX3	0.0996933	0.0222137
TICRR	ENO1	0.396376	3.09777e-21
TICRR	SLC12A1	0.209831	1.20324e-06
TICRR	MYDGF	0.19196	9.2773e-06
TICRR	ANO8	0.311516	2.6674e-13
TICRR	TUBE1	0.324653	2.24231e-14
TICRR	ARHGEF10L	0.25958	1.51157e-09
TICRR	TXK	0.172756	6.81494e-05
TICRR	WSCD2	-0.129728	0.00287505
TICRR	TACR2	0.102248	0.0189961
TICRR	ACTR6	0.465152	1.34647e-29
TICRR	TIPIN	0.634841	1.09399e-60
TICRR	SRI	0.11171	0.0103485
TICRR	EIF4G3	0.48811	7.684e-33
TICRR	NUP37	0.574885	1.34484e-47
TICRR	SEMA3A	0.412293	5.28848e-23
TICRR	GTSE1	0.874367	1.13107e-166
TICRR	SEMA3C	0.217719	4.60604e-07
TICRR	TTC38	0.133334	0.00218114
TICRR	GRAMD4	0.257578	2.03648e-09
TICRR	CELSR1	0.229794	9.86485e-08
TICRR	WNT8B	0.240494	2.34106e-08
TICRR	ZNF638	0.421123	5.02295e-24
TICRR	SLC25A40	0.418599	9.91654e-24
TICRR	TIMM21	0.437387	5.45854e-26
TICRR	ADD2	0.141947	0.00109728
TICRR	FGF4	0.194745	6.82956e-06
TICRR	RASAL2	0.461914	3.69084e-29
TICRR	VPS9D1	0.296823	3.69078e-12
TICRR	ZNF37A	0.401785	7.96287e-22
TICRR	MARK3	0.452555	6.41465e-28
TICRR	SLC25A3	0.417039	1.50525e-23
TICRR	FNDC3B	0.499395	1.58097e-34
TICRR	FOSL2	0.365881	4.1732e-18
TICRR	CACNG5	0.154809	0.000365855
TICRR	FRYL	0.365718	4.32853e-18
TICRR	TMEM131	0.436945	6.19136e-26
TICRR	FSCN1	0.435209	1.01462e-25
TICRR	ACTB	0.34612	3.00185e-16
TICRR	MOCOS	0.404929	3.57342e-22
TICRR	PLD1	0.460416	5.86547e-29
TICRR	ATP12A	0.106509	0.0145294
TICRR	WDR62	0.742422	3.24242e-93
TICRR	DLG1	0.455731	2.45865e-28
TICRR	RAB7A	0.437211	5.73898e-26
TICRR	BCAP29	0.242683	1.72937e-08
TICRR	SEC31B	0.134079	0.00205844
TICRR	SART3	0.632788	3.43086e-60
TICRR	ARHGAP15	-0.0988024	0.0234416
TICRR	TUBA3D	0.362982	7.9628e-18
TICRR	PAX2	0.20253	2.83375e-06
TICRR	EXOSC7	0.268479	3.89744e-10
TICRR	KIFAP3	0.236679	3.94099e-08
TICRR	MKRN2	0.362096	9.68791e-18
TICRR	MCM6	0.785378	3.1494e-111
TICRR	REXO2	0.266728	5.10869e-10
TICRR	RBM7	0.284199	3.13871e-11
TICRR	RBMS2	0.166095	0.000129775
TICRR	BAZ2A	0.576697	5.91818e-48
TICRR	PTPN23	0.40899	1.25341e-22
TICRR	MLH1	0.294667	5.35982e-12
TICRR	UNG	0.652156	4.99743e-65
TICRR	KLHL20	0.186853	1.60853e-05
TICRR	SLC46A1	0.19938	4.06189e-06
TICRR	PLXNA2	-0.114529	0.00856105
TICRR	SPAG5	0.885621	1.1242e-176
TICRR	ANKRD13A	0.321889	3.81409e-14
TICRR	TPD52	0.367003	3.24375e-18
TICRR	ACACB	0.180882	3.00531e-05
TICRR	TRAF4	0.367582	2.84726e-18
TICRR	GPATCH1	0.531187	1.24194e-39
TICRR	NT5C2	0.34676	2.62593e-16
TICRR	MCAM	0.369243	1.95609e-18
TICRR	GPC4	-0.124966	0.00409826
TICRR	CAMSAP3	0.231645	7.72995e-08
TICRR	RAP1GAP	-0.229442	1.03303e-07
TICRR	XAB2	0.317665	8.49782e-14
TICRR	ARHGEF1	0.18353	2.28337e-05
TICRR	STXBP2	0.259746	1.47461e-09
TICRR	MAP2K7	0.371555	1.1559e-18
TICRR	DGKD	0.202196	2.94458e-06
TICRR	ACTL6B	0.221947	2.71161e-07
TICRR	RARB	0.164139	0.000156069
TICRR	TOP2B	0.335561	2.61326e-15
TICRR	TM9SF3	0.344925	3.85085e-16
TICRR	NFKB2	0.389791	1.56653e-20
TICRR	UBE2T	0.705452	2.25782e-80
TICRR	DNAJC10	0.507186	9.93708e-36
TICRR	GTF3C1	0.472122	1.47988e-30
TICRR	IL4R	0.253704	3.59975e-09
TICRR	USP33	0.41634	1.81381e-23
TICRR	PAK3	-0.123203	0.00465925
TICRR	CAPN6	-0.141429	0.00114486
TICRR	SNRPA	0.513629	9.54616e-37
TICRR	SPAG6	-0.0990288	0.0231242
TICRR	EXOSC5	0.290066	1.1761e-11
TICRR	DYNC1I2	0.394584	4.83284e-21
TICRR	APBB1IP	0.0992312	0.0228434
TICRR	LRCH4	0.220476	3.26436e-07
TICRR	FAM76B	0.452085	7.38625e-28
TICRR	SIRT6	0.320093	5.37035e-14
TICRR	POLD3	0.607851	1.89474e-54
TICRR	CAPZB	0.345297	3.56376e-16
TICRR	GPR137B	0.302617	1.33287e-12
TICRR	NAALAD2	0.10442	0.0165885
TICRR	JADE1	0.185869	1.78551e-05
TICRR	SLC25A43	0.371382	1.2026e-18
TICRR	UBE2A	0.271893	2.28613e-10
TICRR	FGFR1	0.218516	4.17133e-07
TICRR	FKBP6	-0.0948604	0.0296057
TICRR	SMC1B	0.398919	1.64083e-21
TICRR	FBLN1	0.132952	0.00224658
TICRR	ITGA8	-0.232758	6.66851e-08
TICRR	MAP2	0.155995	0.000329169
TICRR	PIAS2	0.353278	6.60323e-17
TICRR	ARAF	0.223574	2.20542e-07
TICRR	MCCC1	0.178013	4.02932e-05
TICRR	LAMP3	-0.0933594	0.032294
TICRR	FAP	0.227368	1.35376e-07
TICRR	NEBL	0.15527	0.00035118
TICRR	ACER3	0.345595	3.34958e-16
TICRR	UBE2K	0.497376	3.20126e-34
TICRR	PIK3C3	0.313583	1.82121e-13
TICRR	N4BP2	0.455069	3.00484e-28
TICRR	TIGAR	0.412847	4.57189e-23
TICRR	TULP3	0.508026	7.34192e-36
TICRR	SYNJ2	0.5697	1.37038e-46
TICRR	ADCY2	-0.19976	3.89036e-06
TICRR	PPP2R5C	0.162493	0.000181999
TICRR	PMS2P1	0.382528	8.97518e-20
TICRR	GNB1	0.435334	9.79258e-26
TICRR	HOXA9	0.399196	1.53036e-21
TICRR	MLLT10	0.399452	1.43504e-21
TICRR	ITM2A	-0.194174	7.27459e-06
TICRR	NRDC	0.596065	6.57998e-52
TICRR	VDAC3	0.412423	5.11083e-23
TICRR	PCM1	0.265504	6.1659e-10
TICRR	TNRC6C	0.187037	1.57743e-05
TICRR	CBFA2T2	0.501976	6.37121e-35
TICRR	BRINP1	-0.122696	0.0048332
TICRR	ITCH	0.477938	2.25468e-31
TICRR	PKD2L2	0.117745	0.0068629
TICRR	TP53INP2	0.388939	1.92662e-20
TICRR	SDF4	0.249626	6.49104e-09
TICRR	MYH7B	0.272526	2.06892e-10
TICRR	TP73	0.211111	1.03214e-06
TICRR	TOLLIP	0.181671	2.77023e-05
TICRR	UBE2D4	0.240928	2.20507e-08
TICRR	CLUL1	-0.220369	3.30873e-07
TICRR	CDH17	0.118847	0.00635448
TICRR	THOC1	0.520775	6.69196e-38
TICRR	SLC1A3	0.14297	0.00100871
TICRR	XRCC5	0.479572	1.32009e-31
TICRR	LXN	0.163115	0.00017177
TICRR	SP140	0.166948	0.00011966
TICRR	MKNK1	0.358765	2.01458e-17
TICRR	REXO1	0.489419	4.93311e-33
TICRR	SAR1A	0.338953	1.31565e-15
TICRR	CDC14A	0.1673	0.00011571
TICRR	CEACAM1	0.0961792	0.0274044
TICRR	SENP1	0.666303	8.61378e-69
TICRR	DUSP13	0.245421	1.17914e-08
TICRR	CIC	0.36542	4.62703e-18
TICRR	LIPE	0.176145	4.86507e-05
TICRR	FDFT1	0.140993	0.00118629
TICRR	PAFAH1B3	0.395762	3.60908e-21
TICRR	AFM	0.173898	6.08744e-05
TICRR	KIF22	0.552528	2.2429e-43
TICRR	CARMIL1	0.420677	5.66808e-24
TICRR	PGM1	0.332996	4.3658e-15
TICRR	DDX1	0.465846	1.08309e-29
TICRR	DNM2	0.273188	1.86357e-10
TICRR	EPB41L2	0.205178	2.08432e-06
TICRR	STX7	0.197028	5.29529e-06
TICRR	RABL2B	0.14861	0.000628014
TICRR	KEAP1	0.287568	1.79141e-11
TICRR	DDX43	0.161642	0.000196942
TICRR	PTPRH	0.318518	7.23573e-14
TICRR	SLC35C2	0.37756	2.8889e-19
TICRR	CRYBG3	0.351164	1.03694e-16
TICRR	EPHA6	0.314191	1.62716e-13
TICRR	SCTR	-0.368038	2.56938e-18
TICRR	RFX3	0.262643	9.534e-10
TICRR	RIF1	0.584808	1.40781e-49
TICRR	RAB21	0.346287	2.8988e-16
TICRR	SLC4A4	-0.175955	4.95834e-05
TICRR	RDH8	0.142032	0.00108967
TICRR	MID2	0.170289	8.67488e-05
TICRR	DNAAF6	-0.182383	2.57317e-05
TICRR	COL5A3	0.388514	2.13587e-20
TICRR	SRCAP	0.355304	4.27104e-17
TICRR	PUM3	0.491061	2.82215e-33
TICRR	CPB2	-0.236041	4.29561e-08
TICRR	CHRNA3	0.217808	4.55495e-07
TICRR	CNOT4	0.43182	2.63805e-25
TICRR	PSEN1	0.34398	4.68534e-16
TICRR	CPOX	0.455644	2.52463e-28
TICRR	CLDND1	0.414674	2.82245e-23
TICRR	MOK	0.264288	7.42573e-10
TICRR	HSP90AA1	0.464016	1.92014e-29
TICRR	RBL1	0.73855	9.0717e-92
TICRR	DLGAP4	0.487979	8.03312e-33
TICRR	IGSF9B	-0.19721	5.18872e-06
TICRR	CFHR2	0.115714	0.00789585
TICRR	CROCCP3	0.168723	0.000100941
TICRR	NDC80	0.851339	6.43601e-149
TICRR	AP4E1	0.47033	2.62318e-30
TICRR	RSBN1	0.174583	5.68675e-05
TICRR	AFP	0.110057	0.0115434
TICRR	COL4A4	-0.127532	0.00339051
TICRR	TCF7	0.20807	1.48353e-06
TICRR	OSTM1	0.195806	6.07002e-06
TICRR	CDH7	0.29108	9.90243e-12
TICRR	IMPG2	0.290251	1.13978e-11
TICRR	PCNP	0.329208	9.23553e-15
TICRR	EXD2	0.349816	1.38027e-16
TICRR	ARG2	0.258005	1.91159e-09
TICRR	MEF2C	-0.1245	0.00424042
TICRR	UBA5	0.472383	1.36127e-30
TICRR	CDC14B	0.238364	3.13421e-08
TICRR	ZNF510	0.301412	1.65065e-12
TICRR	ZNF506	0.188822	1.30326e-05
TICRR	JMJD4	0.334514	3.22422e-15
TICRR	DUSP12	0.44469	6.60605e-27
TICRR	AACS	0.520632	7.06306e-38
TICRR	PCDHA6	0.156183	0.000323671
TICRR	PCDHGA2	0.189916	1.15841e-05
TICRR	HSPB11	0.377394	3.00341e-19
TICRR	PHLPP1	0.434948	1.09241e-25
TICRR	ATP8B1	0.197466	5.04172e-06
TICRR	IL12RB2	0.540149	3.58662e-41
TICRR	SMARCD3	-0.139924	0.00129398
TICRR	WDR70	0.398161	1.98431e-21
TICRR	FYB1	0.230405	9.10384e-08
TICRR	MPP4	0.224486	1.96282e-07
TICRR	STRADB	0.24931	6.79074e-09
TICRR	BZW1	0.408639	1.37281e-22
TICRR	PGR	-0.21587	5.7872e-07
TICRR	ME2	0.356909	3.01781e-17
TICRR	C5orf22	0.528624	3.35687e-39
TICRR	CCNT2	0.322986	3.09092e-14
TICRR	FAM135A	0.399024	1.59795e-21
TICRR	EPB41L3	0.26666	5.16226e-10
TICRR	DLG3	0.296891	3.64714e-12
TICRR	KCNK2	0.218408	4.22783e-07
TICRR	TRAF5	0.312992	2.03199e-13
TICRR	MRPL22	0.267027	4.87885e-10
TICRR	GEMIN5	0.423809	2.42066e-24
TICRR	NFE2L1	0.398045	2.04254e-21
TICRR	SEMA5B	0.408949	1.2668e-22
TICRR	GSK3B	0.559887	9.9187e-45
TICRR	ITGB5	0.272962	1.93147e-10
TICRR	ERC1	0.451558	8.65052e-28
TICRR	XPO1	0.638016	1.83636e-61
TICRR	LINC01587	0.21326	7.96122e-07
TICRR	RNF13	0.167588	0.000112567
TICRR	TRPM3	0.0865236	0.0473238
TICRR	PALB2	0.532972	6.18199e-40
TICRR	DOP1A	0.231356	8.03114e-08
TICRR	LYRM2	0.277751	8.99287e-11
TICRR	BCKDHB	0.205895	1.91656e-06
TICRR	KAT6A	0.458891	9.37221e-29
TICRR	TUT7	0.372955	8.38723e-19
TICRR	ULK2	0.177939	4.0594e-05
TICRR	GRHL2	0.272175	2.18661e-10
TICRR	TNPO1	0.425814	1.39785e-24
TICRR	PLOD1	0.425755	1.42067e-24
TICRR	P2RX5	0.224365	1.99358e-07
TICRR	ITGAE	0.292769	7.42519e-12
TICRR	DIS3	0.364369	5.85026e-18
TICRR	PIBF1	0.140873	0.00119801
TICRR	TDRD3	0.0864197	0.0475912
TICRR	NUFIP1	0.503412	3.83053e-35
TICRR	PDS5B	0.375453	4.71499e-19
TICRR	OXCT1	0.326837	1.46828e-14
TICRR	RRAGB	0.257944	1.92903e-09
TICRR	EPYC	0.16976	9.13249e-05
TICRR	CYLD	0.120281	0.00574355
TICRR	SLC27A5	0.169985	8.93504e-05
TICRR	ZNF324	0.312671	2.1561e-13
TICRR	ZNF416	0.270627	2.78856e-10
TICRR	ZNF586	0.21112	1.03101e-06
TICRR	ZNF446	0.276409	1.11578e-10
TICRR	ZNF264	0.214658	6.71481e-07
TICRR	RPS5	0.106392	0.014639
TICRR	FAT1	0.290317	1.12705e-11
TICRR	YTHDC1	0.447859	2.60055e-27
TICRR	CHMP2B	0.281461	4.92413e-11
TICRR	SMAP2	0.137218	0.00160771
TICRR	PPIE	0.331291	6.12392e-15
TICRR	ZMPSTE24	0.359118	1.86473e-17
TICRR	STARD7	0.459647	7.4304e-29
TICRR	NOA1	0.338006	1.59505e-15
TICRR	REST	0.420425	6.0673e-24
TICRR	HAL	0.176478	4.70472e-05
TICRR	SSH1	0.465197	1.32753e-29
TICRR	GSTP1	0.140431	0.00124184
TICRR	FAM234B	0.374596	5.74785e-19
TICRR	SLCO1A2	0.220346	3.31802e-07
TICRR	WBP11	0.565365	9.24556e-46
TICRR	EIF3I	0.29245	7.84084e-12
TICRR	NKAIN1	0.448496	2.15361e-27
TICRR	COL16A1	0.228816	1.12118e-07
TICRR	TXLNA	0.413356	3.998e-23
TICRR	APOB	0.114745	0.0084362
TICRR	NCOA1	0.368302	2.42036e-18
TICRR	AGBL5	0.427454	8.89585e-25
TICRR	EFR3B	0.196464	5.64051e-06
TICRR	KIF3C	0.610347	5.31764e-55
TICRR	RAB10	0.556653	3.94344e-44
TICRR	GCKR	0.211779	9.52362e-07
TICRR	HADHA	0.377495	2.93306e-19
TICRR	CAD	0.70118	5.11892e-79
TICRR	CD59	-0.189502	1.21139e-05
TICRR	BCORL1	0.424832	1.83012e-24
TICRR	ATRX	0.283615	3.45664e-11
TICRR	AK6	0.33221	5.10418e-15
TICRR	MYNN	0.355241	4.33005e-17
TICRR	MECOM	-0.117873	0.00680193
TICRR	SCAMP1	0.201201	3.30081e-06
TICRR	PREP	0.419196	8.44706e-24
TICRR	HACE1	0.378184	2.49721e-19
TICRR	SEH1L	0.505056	2.13237e-35
TICRR	WDR47	0.248764	7.34273e-09
TICRR	WDFY1	0.424426	2.04496e-24
TICRR	SLC25A24	0.32023	5.23272e-14
TICRR	MAP3K4	0.462018	3.57442e-29
TICRR	PILRA	0.157569	0.000285752
TICRR	IGSF9	0.40165	8.23943e-22
TICRR	ABCB1	0.100707	0.020885
TICRR	ZNF213	0.224974	1.84392e-07
TICRR	AKR1B1	0.259108	1.62211e-09
TICRR	CPNE3	0.153263	0.000419437
TICRR	RRN3	0.369642	1.78699e-18
TICRR	CTTN	0.340678	9.25134e-16
TICRR	WNT11	-0.116876	0.0072893
TICRR	MTIF2	0.610323	5.38174e-55
TICRR	DDHD2	0.427322	9.22517e-25
TICRR	TTC39A	0.115857	0.00781914
TICRR	EPS15	0.284252	3.11123e-11
TICRR	ORC1	0.849696	9.09839e-148
TICRR	CHERP	0.521079	5.96794e-38
TICRR	ATG16L1	0.431194	3.14403e-25
TICRR	USP40	0.341152	8.39449e-16
TICRR	POMGNT1	0.229479	1.02813e-07
TICRR	RAD54L	0.893199	5.04509e-184
TICRR	MAST2	0.593424	2.36106e-51
TICRR	DNAJA1	0.448304	2.27967e-27
TICRR	B4GALT1	0.450672	1.12741e-27
TICRR	CHMP5	0.256513	2.38386e-09
TICRR	NFX1	0.382221	9.6529e-20
TICRR	DIMT1	0.306585	6.54925e-13
TICRR	IPO11	0.327985	1.17352e-14
TICRR	FOLH1	0.317785	8.30829e-14
TICRR	EIF2AK1	0.47302	1.10928e-30
TICRR	EPDR1	-0.227675	1.30088e-07
TICRR	SNX10	0.253454	3.73344e-09
TICRR	SEPHS1	0.523093	2.78837e-38
TICRR	MRPL28	0.286332	2.20266e-11
TICRR	HBQ1	0.264736	6.93422e-10
TICRR	ITPKC	0.173616	6.25978e-05
TICRR	CEACAM6	-0.196719	5.48212e-06
TICRR	FAT2	0.107456	0.0136724
TICRR	RBM22	0.306229	6.98307e-13
TICRR	TMED2	0.401333	8.92898e-22
TICRR	ZFAND6	0.220908	3.0919e-07
TICRR	HSD17B2	-0.132043	0.00240965
TICRR	TXLNG	0.344559	4.15559e-16
TICRR	PPEF1	0.187668	1.47484e-05
TICRR	LAT2	0.127535	0.00338984
TICRR	HUWE1	0.552742	2.05126e-43
TICRR	ZW10	0.543302	1.00489e-41
TICRR	ALG9	0.46551	1.20349e-29
TICRR	NOX4	0.170056	8.87377e-05
TICRR	ACOX3	0.16293	0.000174747
TICRR	MTMR2	0.493015	1.44601e-33
TICRR	PPP1R15A	0.159736	0.000234678
TICRR	HSD17B14	0.174905	5.50765e-05
TICRR	TRIP6	0.0912815	0.0363578
TICRR	FTL	0.0861761	0.0482232
TICRR	SRRT	0.565917	7.26353e-46
TICRR	BAX	0.348143	1.96437e-16
TICRR	NLK	0.428181	7.27438e-25
TICRR	PIGS	0.389348	1.7446e-20
TICRR	ADAMTS2	0.332607	4.71734e-15
TICRR	TMPRSS11E	0.224726	1.90346e-07
TICRR	ATXN7L3	0.557847	2.37267e-44
TICRR	PGS1	0.312059	2.41389e-13
TICRR	PSMC5	0.443498	9.35688e-27
TICRR	UIMC1	0.348364	1.87527e-16
TICRR	CETP	0.200101	3.74225e-06
TICRR	MMP2	0.129284	0.00297297
TICRR	MT3	0.10902	0.0123549
TICRR	OGFOD1	0.417052	1.50028e-23
TICRR	SH3BP2	0.505631	1.73575e-35
TICRR	NOP14	0.458526	1.04829e-28
TICRR	ADD1	0.28369	3.41436e-11
TICRR	L2HGDH	0.504568	2.53786e-35
TICRR	TXNDC16	0.285048	2.72713e-11
TICRR	RTRAF	0.373732	7.01595e-19
TICRR	NID2	0.404924	3.5779e-22
TICRR	GMCL1	0.398553	1.79838e-21
TICRR	SF3B2	0.517939	1.93582e-37
TICRR	KLHL42	0.500913	9.27314e-35
TICRR	GNAS	0.314728	1.47237e-13
TICRR	DNM1L	0.616373	2.35987e-56
TICRR	PTHLH	0.317579	8.63668e-14
TICRR	PHACTR3	-0.0964142	0.0270274
TICRR	ERGIC2	0.478845	1.6758e-31
TICRR	TFAP2C	0.182329	2.58764e-05
TICRR	AURKA	0.789231	4.79225e-113
TICRR	CASS4	-0.128516	0.0031499
TICRR	PIR	0.209691	1.22346e-06
TICRR	AAMDC	0.161353	0.00020227
TICRR	RFX2	0.0978698	0.0247897
TICRR	METTL2A	0.454132	3.98958e-28
TICRR	SULT2B1	0.253205	3.87092e-09
TICRR	ALG6	0.455534	2.60978e-28
TICRR	CNOT3	0.520987	6.17895e-38
TICRR	GP6	0.111802	0.0102853
TICRR	PTPN4	0.132216	0.00237776
TICRR	DDX18	0.529226	2.65932e-39
TICRR	KHSRP	0.587273	4.42665e-50
TICRR	GNA11	0.342593	6.242e-16
TICRR	EDEM2	0.185749	1.8084e-05
TICRR	DNMT3B	0.746339	1.04824e-94
TICRR	TPX2	0.876798	9.47456e-169
TICRR	FER1L4	0.426524	1.14975e-24
TICRR	PDRG1	0.420262	6.33978e-24
TICRR	EPB41L1	0.161654	0.000196732
TICRR	SLC15A1	0.2753	1.33232e-10
TICRR	DOCK9	0.0942618	0.0306538
TICRR	ANKRD10	0.149334	0.000590235
TICRR	TGDS	0.2556	2.72722e-09
TICRR	DOCK3	0.249264	6.83591e-09
TICRR	COQ9	0.295743	4.45064e-12
TICRR	TMEM40	0.213622	7.6186e-07
TICRR	ARHGAP28	0.169503	9.36241e-05
TICRR	CRLS1	0.0933408	0.0323286
TICRR	ATRN	0.324625	2.25454e-14
TICRR	SMOX	0.431258	3.08808e-25
TICRR	SIGLEC1	0.170611	8.40743e-05
TICRR	FKBP1A	0.379925	1.6602e-19
TICRR	NSFL1C	0.387096	3.009e-20
TICRR	SLC4A11	0.260915	1.23739e-09
TICRR	DNAAF9	0.138263	0.0014791
TICRR	ZNF343	0.46746	6.51687e-30
TICRR	CPXM1	0.344338	4.35003e-16
TICRR	MAVS	0.428901	5.95759e-25
TICRR	LZTS3	0.117742	0.00686429
TICRR	F11	-0.319839	5.63516e-14
TICRR	XRN2	0.410026	9.5723e-23
TICRR	KIZ	0.197437	5.0577e-06
TICRR	DYNLL1	0.431146	3.18616e-25
TICRR	SNX5	0.310108	3.45316e-13
TICRR	RPL6	0.264302	7.40953e-10
TICRR	SIRPG	0.197293	5.14016e-06
TICRR	MAPKAPK5	0.537506	1.03162e-40
TICRR	P2RX7	0.125599	0.00391219
TICRR	ESF1	0.595619	8.1684e-52
TICRR	RBBP9	0.169803	9.09431e-05
TICRR	ANAPC5	0.493692	1.1459e-33
TICRR	SLC23A2	0.391048	1.15295e-20
TICRR	SLC8B1	0.381552	1.13099e-19
TICRR	TMEM230	0.259522	1.52472e-09
TICRR	DZANK1	0.271224	2.5393e-10
TICRR	KDM2B	0.550305	5.66756e-43
TICRR	CFAP61	-0.0920019	0.0349022
TICRR	LHX5	0.244991	1.25271e-08
TICRR	TASP1	0.314597	1.50881e-13
TICRR	OAS1	0.370756	1.38701e-18
TICRR	GCN1	0.641876	2.03847e-62
TICRR	RPLP0	0.285744	2.42913e-11
TICRR	PXN	0.389412	1.71754e-20
TICRR	RPH3A	0.116238	0.00761682
TICRR	KIF16B	0.164866	0.000145766
TICRR	TRMT6	0.520523	7.35698e-38
TICRR	CHGB	0.14336	0.000976756
TICRR	PEBP1	0.122127	0.00503495
TICRR	TBX5	-0.174691	5.62629e-05
TICRR	BRAP	0.544757	5.55843e-42
TICRR	ERP29	0.213512	7.72133e-07
TICRR	FUS	0.492714	1.60367e-33
TICRR	IGBP1	0.100566	0.0210657
TICRR	FXYD5	0.0955217	0.0284837
TICRR	ZNF302	0.233352	6.16182e-08
TICRR	GRAMD1A	0.282418	4.20958e-11
TICRR	FXYD3	-0.0939024	0.0312983
TICRR	HEPH	0.0884356	0.0426223
TICRR	CMTM1	0.376079	4.07739e-19
TICRR	KCNH4	0.211149	1.02745e-06
TICRR	GANAB	0.531593	1.0601e-39
TICRR	GMIP	0.30162	1.59094e-12
TICRR	RBM41	0.428958	5.86344e-25
TICRR	BIRC5	0.764485	5.50633e-102
TICRR	LAG3	0.363026	7.88489e-18
TICRR	MLF2	0.41968	7.41551e-24
TICRR	OTUB2	0.448612	2.08102e-27
TICRR	DDX24	0.262892	9.18091e-10
TICRR	ZBTB25	0.276585	1.08478e-10
TICRR	NECAP1	0.313719	1.77611e-13
TICRR	ARHGAP4	0.336908	1.99183e-15
TICRR	DHX32	0.141545	0.00113403
TICRR	RCOR1	0.37439	6.02795e-19
TICRR	GPATCH2L	0.45772	1.34159e-28
TICRR	BLVRB	0.0857319	0.0493938
TICRR	SLC9A1	0.229033	1.08989e-07
TICRR	SPTLC1	0.354899	4.66131e-17
TICRR	PAPOLA	0.486403	1.36549e-32
TICRR	CCNK	0.54981	6.95952e-43
TICRR	PCBP4	0.271589	2.39786e-10
TICRR	MRPS33	0.271677	2.36488e-10
TICRR	NDUFB2	0.211568	9.7686e-07
TICRR	NUDC	0.349341	1.52603e-16
TICRR	MAEA	0.411684	6.20569e-23
TICRR	STRN4	0.522979	2.91049e-38
TICRR	MUL1	0.241417	2.06115e-08
TICRR	TFAP4	0.416234	1.86534e-23
TICRR	PDCD7	0.444364	7.26696e-27
TICRR	SPG21	0.316182	1.12241e-13
TICRR	FETUB	0.174486	5.74226e-05
TICRR	DNAJB11	0.615295	4.14062e-56
TICRR	P3H2	-0.142312	0.00106496
TICRR	THPO	0.20492	2.14788e-06
TICRR	CHRD	0.137217	0.00160784
TICRR	FLT3LG	0.109717	0.0118038
TICRR	RAB11FIP3	0.201384	3.23249e-06
TICRR	ZNF268	0.32712	1.38959e-14
TICRR	GOLGA3	0.490232	3.74322e-33
TICRR	PABPC4	0.40031	1.15612e-21
TICRR	CD209	0.24028	2.411e-08
TICRR	MCOLN1	0.259916	1.43755e-09
TICRR	USP48	0.339311	1.2233e-15
TICRR	EFNB1	0.156077	0.000326755
TICRR	PDPR	0.29453	5.48777e-12
TICRR	AARS1	0.414666	2.82878e-23
TICRR	GLG1	0.402443	6.73782e-22
TICRR	KIF4A	0.874201	1.56217e-166
TICRR	TNRC6A	0.405203	3.33061e-22
TICRR	PLEKHG2	0.418222	1.09717e-23
TICRR	DLL3	0.277113	9.96565e-11
TICRR	NAT14	0.219879	3.51826e-07
TICRR	PITPNM2	0.364892	5.2056e-18
TICRR	EXOC1	0.426457	1.17129e-24
TICRR	RBM27	0.391443	1.04671e-20
TICRR	POU4F3	0.158009	0.000274603
TICRR	OSBPL8	0.336018	2.38344e-15
TICRR	DTX2	0.293309	6.76845e-12
TICRR	NLRC4	0.0879557	0.0437638
TICRR	PUS7	0.564928	1.1191e-45
TICRR	LAMB4	0.145893	0.000790734
TICRR	NRCAM	0.223521	2.22041e-07
TICRR	LAMB1	0.414194	3.20492e-23
TICRR	DLD	0.458891	9.37389e-29
TICRR	WDR7	0.291448	9.30124e-12
TICRR	TXNL1	0.26846	3.90839e-10
TICRR	IL5RA	-0.180248	3.20763e-05
TICRR	ABCC6	-0.171422	7.7678e-05
TICRR	CMTM6	0.235375	4.69904e-08
TICRR	ITGA6	0.289383	1.32003e-11
TICRR	RAPGEF4	0.164451	0.000151565
TICRR	MAP3K20	0.388138	2.33933e-20
TICRR	FH	0.393918	5.69655e-21
TICRR	SEL1L3	0.109482	0.0119874
TICRR	TF	0.232772	6.65661e-08
TICRR	CDV3	0.565248	9.73334e-46
TICRR	MYO15A	0.0888666	0.0416189
TICRR	ALKBH5	0.342452	6.42626e-16
TICRR	APOH	-0.191354	9.91139e-06
TICRR	SPAG7	0.11794	0.00677022
TICRR	ORC6	0.8044	1.3606e-120
TICRR	ZFHX4	0.3517	9.25027e-17
TICRR	ZC3HC1	0.508132	7.06627e-36
TICRR	ESR1	0.0932533	0.0324916
TICRR	RGS17	0.177421	4.27832e-05
TICRR	ANGPT2	0.379979	1.63927e-19
TICRR	TMEM101	0.141742	0.00111588
TICRR	CD200	0.189235	1.2467e-05
TICRR	CCDC80	0.159864	0.000231947
TICRR	CMA1	-0.215904	5.76347e-07
TICRR	PSME1	0.198173	4.65602e-06
TICRR	PPP2R3C	0.317528	8.71983e-14
TICRR	HAUS4	0.10695	0.0141251
TICRR	JPH4	-0.1227	0.00483165
TICRR	MYH7	0.256186	2.5017e-09
TICRR	OSGEP	0.2281	1.23091e-07
TICRR	RNF31	0.458475	1.065e-28
TICRR	SCFD1	0.410428	8.61857e-23
TICRR	G2E3	0.532124	8.61637e-40
TICRR	HECTD1	0.366369	3.74064e-18
TICRR	HNRNPC	0.474572	6.72809e-31
TICRR	RPGRIP1	0.193804	7.57819e-06
TICRR	SUPT16H	0.619453	4.68088e-57
TICRR	TOX4	0.405654	2.96707e-22
TICRR	GEMIN2	0.461927	3.67604e-29
TICRR	TGM1	0.221943	2.71322e-07
TICRR	TINF2	0.264283	7.431e-10
TICRR	DAZL	0.109848	0.0117035
TICRR	SEMA6A	0.191534	9.7185e-06
TICRR	TRPM7	0.316998	9.6331e-14
TICRR	TYRO3	0.378843	2.14002e-19
TICRR	WDR76	0.764328	6.40587e-102
TICRR	CAPN3	-0.113333	0.00928261
TICRR	SNAP23	0.269062	3.55947e-10
TICRR	TBX15	0.093269	0.0324623
TICRR	PHGDH	0.431514	2.87483e-25
TICRR	COL9A3	0.304955	8.78018e-13
TICRR	EZR	0.148794	0.000618207
TICRR	MYL6	0.190507	1.08666e-05
TICRR	AGO1	0.432422	2.22833e-25
TICRR	CLSPN	0.85917	1.33989e-154
TICRR	RFFL	0.58476	1.43995e-49
TICRR	UNC13D	0.297444	3.3127e-12
TICRR	MFSD11	0.373538	7.33623e-19
TICRR	DPYSL2	-0.155243	0.000352016
TICRR	TGFB2	0.125972	0.00380621
TICRR	GPATCH2	0.400409	1.12764e-21
TICRR	NUP50	0.569516	1.48647e-46
TICRR	CDC45	0.830219	4.25722e-135
TICRR	COMT	0.139553	0.00133329
TICRR	ADA2	0.103412	0.0176714
TICRR	LRRFIP2	0.313084	1.99766e-13
TICRR	SEC22C	0.261371	1.1554e-09
TICRR	XYLB	0.527294	5.60336e-39
TICRR	HDAC6	0.3745	5.87673e-19
TICRR	KRT31	0.192595	8.65442e-06
TICRR	CDC6	0.851571	4.41663e-149
TICRR	UPRT	0.12368	0.00450116
TICRR	CDC23	0.422646	3.32386e-24
TICRR	AAAS	0.470915	2.17746e-30
TICRR	CBX5	0.530287	1.76268e-39
TICRR	FMO2	-0.222069	2.67018e-07
TICRR	SUCO	0.430247	4.09659e-25
TICRR	MSH2	0.667311	4.56053e-69
TICRR	MAP3K1	0.136378	0.00171857
TICRR	DHPS	0.27029	2.93944e-10
TICRR	HOOK2	0.299978	2.12552e-12
TICRR	ARCN1	0.46225	3.32648e-29
TICRR	EPB41L4B	0.249294	6.80696e-09
TICRR	TMEM38B	0.457378	1.48942e-28
TICRR	PSMD5	0.373495	7.40855e-19
TICRR	PTGS1	0.136002	0.00177026
TICRR	NUP188	0.578599	2.48591e-48
TICRR	CRAT	0.227638	1.30728e-07
TICRR	NANS	0.269423	3.36521e-10
TICRR	WHRN	0.340122	1.03653e-15
TICRR	PDE6C	0.21888	3.98627e-07
TICRR	CWF19L1	0.396089	3.32693e-21
TICRR	SEMA4G	0.197891	4.80613e-06
TICRR	BTAF1	0.387155	2.96633e-20
TICRR	IKZF5	0.10342	0.0176617
TICRR	TLL2	0.296201	4.11159e-12
TICRR	CYP26A1	0.0898846	0.0393275
TICRR	CRTAC1	-0.21753	4.71474e-07
TICRR	BAMBI	0.0882691	0.0430156
TICRR	IL11	0.400504	1.10089e-21
TICRR	WAC	0.483928	3.12568e-32
TICRR	CREM	0.312014	2.43359e-13
TICRR	NUBP2	0.200692	3.49861e-06
TICRR	TPSD1	-0.0924949	0.033935
TICRR	SMIM24	0.20087	3.42838e-06
TICRR	HIVEP1	0.383382	7.32513e-20
TICRR	KCNK16	-0.107491	0.0136421
TICRR	CRISP3	0.0931145	0.0327518
TICRR	FKBP5	0.219061	3.89729e-07
TICRR	SRPK1	0.585939	8.29145e-50
TICRR	BRPF3	0.379762	1.7251e-19
TICRR	MRPS18A	0.291372	9.42294e-12
TICRR	PGC	-0.376366	3.81456e-19
TICRR	TMEM14A	0.329382	8.92505e-15
TICRR	EFHC1	0.124794	0.00415011
TICRR	NCR2	0.126815	0.00357607
TICRR	HSP90AB1	0.439594	2.89932e-26
TICRR	MLN	0.177781	4.12516e-05
TICRR	CDC5L	0.477524	2.58118e-31
TICRR	ITPR3	0.23365	5.92169e-08
TICRR	ZNF184	0.353211	6.6991e-17
TICRR	DSP	0.508103	7.13937e-36
TICRR	SIRT1	0.278498	7.97257e-11
TICRR	HNRNPH3	0.548349	1.2739e-42
TICRR	IFT74	0.24222	1.84421e-08
TICRR	JAK2	0.131592	0.0024945
TICRR	IL12RB1	0.196838	5.40928e-06
TICRR	ABL1	0.424557	1.97323e-24
TICRR	ACOT7	0.454238	3.86419e-28
TICRR	SH3GLB1	0.332695	4.63502e-15
TICRR	CDC7	0.785674	2.2911e-111
TICRR	SYDE2	0.184335	2.09873e-05
TICRR	SCD	0.427458	8.88602e-25
TICRR	TMED1	0.196391	5.68693e-06
TICRR	ABLIM1	0.186603	1.652e-05
TICRR	ERMP1	0.518721	1.44612e-37
TICRR	RAB18	0.298819	2.60529e-12
TICRR	NRP1	0.12073	0.00556316
TICRR	HSD17B7P2	0.12716	0.00348581
TICRR	PRTFDC1	0.555088	7.64771e-44
TICRR	PALMD	-0.131656	0.0024823
TICRR	TSPAN15	0.224184	2.04015e-07
TICRR	MACROH2A2	0.211947	9.33317e-07
TICRR	WASHC2A	0.356454	3.33059e-17
TICRR	MAST3	0.277005	1.01408e-10
TICRR	MZF1	0.231535	7.84343e-08
TICRR	OCEL1	0.104472	0.016535
TICRR	MYO9B	0.425288	1.61522e-24
TICRR	KCNK6	0.294271	5.73815e-12
TICRR	PSMD8	0.304646	9.28023e-13
TICRR	FBXL19	0.533857	4.36799e-40
TICRR	STX1B	0.321687	3.96399e-14
TICRR	HSD3B7	0.205365	2.03928e-06
TICRR	SETD1A	0.481565	6.84531e-32
TICRR	BCL7C	0.187214	1.54795e-05
TICRR	MAGEB2	0.332755	4.58054e-15
TICRR	EFNA2	0.248663	7.44931e-09
TICRR	ATP5F1D	0.248977	7.12172e-09
TICRR	CBARP	0.488831	6.02218e-33
TICRR	PRKY	0.154075	0.000390456
TICRR	IGFALS	-0.125678	0.00388967
TICRR	HNRNPM	0.569958	1.22208e-46
TICRR	MARCHF2	0.0952148	0.0289998
TICRR	NDUFB7	0.15709	0.000298363
TICRR	TECR	0.196413	5.67277e-06
TICRR	TIMM13	0.301382	1.65939e-12
TICRR	CDC34	0.430363	3.96566e-25
TICRR	MTAP	0.312882	2.07357e-13
TICRR	MISP	0.208825	1.35634e-06
TICRR	CEP170B	0.351915	8.83583e-17
TICRR	POLR2E	0.322088	3.67125e-14
TICRR	POLRMT	0.419675	7.4258e-24
TICRR	HCN2	0.326429	1.58941e-14
TICRR	CDHR5	0.184949	1.96763e-05
TICRR	MADCAM1	0.218896	3.97861e-07
TICRR	IGF2-AS	0.220498	3.25529e-07
TICRR	MKNK2	0.26295	9.10056e-10
TICRR	ARVCF	0.231353	8.03428e-08
TICRR	TRMT2A	0.385486	4.43186e-20
TICRR	RANBP1	0.641515	2.50746e-62
TICRR	ZDHHC8	0.291788	8.77815e-12
TICRR	KLHL22	0.311803	2.53008e-13
TICRR	MED15	0.403428	5.2431e-22
TICRR	SERPIND1	-0.20972	1.2193e-06
TICRR	SNAP29	0.345946	3.11307e-16
TICRR	CRKL	0.506242	1.39453e-35
TICRR	LZTR1	0.383614	6.93274e-20
TICRR	MMP11	0.18623	1.71867e-05
TICRR	SMARCB1	0.432016	2.49702e-25
TICRR	BCL2L13	0.390475	1.32613e-20
TICRR	DDTL	0.263908	7.86808e-10
TICRR	DDT	0.197173	5.21015e-06
TICRR	OSM	0.142692	0.00103215
TICRR	CABIN1	0.310884	2.9954e-13
TICRR	TBC1D10A	0.136096	0.00175725
TICRR	SUSD2	-0.377987	2.61509e-19
TICRR	SF3A1	0.381835	1.05767e-19
TICRR	RNF215	0.317495	8.77423e-14
TICRR	SEC14L2	0.274888	1.42286e-10
TICRR	SEC14L3	-0.224979	1.84274e-07
TICRR	SPECC1L	0.337592	1.73435e-15
TICRR	PPIL2	0.417591	1.29913e-23
TICRR	YPEL1	0.110498	0.0112131
TICRR	SNRPD3	0.45521	2.87902e-28
TICRR	PES1	0.453866	4.32345e-28
TICRR	MAPK1	0.383096	7.84141e-20
TICRR	PRODH	-0.157272	0.000293508
TICRR	PPM1F	0.376343	3.8355e-19
TICRR	SLC35E4	0.330882	6.64099e-15
TICRR	TOP3B	0.478835	1.68143e-31
TICRR	CRYBB3	0.25443	3.23764e-09
TICRR	CYTH4	0.166055	0.000130272
TICRR	ESS2	0.394605	4.8078e-21
TICRR	CRYBB2P1	0.410453	8.56357e-23
TICRR	CARD10	0.243686	1.50373e-08
TICRR	LRP5L	0.211419	9.94556e-07
TICRR	SLC25A1	0.333211	4.18263e-15
TICRR	GRK3	0.206008	1.89153e-06
TICRR	LGALS2	-0.0934406	0.0321434
TICRR	GGA1	0.334097	3.50484e-15
TICRR	HIRA	0.464958	1.43059e-29
TICRR	SH3BP1	0.525463	1.13073e-38
TICRR	LGALS1	0.200248	3.68026e-06
TICRR	HPS4	0.439644	2.85777e-26
TICRR	PIK3IP1	-0.142506	0.00104805
TICRR	SRRD	0.436355	7.32531e-26
TICRR	PATZ1	0.37647	3.72424e-19
TICRR	TRIOBP	0.210427	1.12033e-06
TICRR	TFIP11	0.429387	5.20547e-25
TICRR	GCAT	0.140485	0.00123642
TICRR	GGTLC2	-0.191328	9.93889e-06
TICRR	ANKRD54	0.296556	3.8659e-12
TICRR	EIF3L	0.173467	6.35279e-05
TICRR	SNU13	0.245402	1.18232e-08
TICRR	MICALL1	0.500006	1.27576e-34
TICRR	POLR2F	0.16929	9.5567e-05
TICRR	CCDC134	0.398482	1.83074e-21
TICRR	DEPDC5	0.516435	3.38716e-37
TICRR	PICK1	0.302654	1.3243e-12
TICRR	TTC28	0.21433	6.98929e-07
TICRR	SLC16A8	0.290114	1.16666e-11
TICRR	CENPM	0.670657	5.4318e-70
TICRR	SEPTIN3	0.389083	1.8606e-20
TICRR	TPTEP1	-0.0869396	0.0462653
TICRR	KDELR3	0.165256	0.000140498
TICRR	CYP2D6	0.102725	0.0184428
TICRR	DDX17	0.239699	2.61109e-08
TICRR	DMC1	0.518624	1.49905e-37
TICRR	TCF20	0.46797	5.54748e-30
TICRR	HSCB	0.196575	5.57069e-06
TICRR	CBY1	0.141051	0.00118071
TICRR	TOMM22	0.320946	4.56605e-14
TICRR	RTCB	0.349178	1.57959e-16
TICRR	JOSD1	0.41119	7.06244e-23
TICRR	FBXO7	0.33011	7.73345e-15
TICRR	GTPBP1	0.362993	7.94332e-18
TICRR	POLDIP3	0.264324	7.38494e-10
TICRR	TIMP3	0.118664	0.00643659
TICRR	PPP6R2	0.251042	5.29524e-09
TICRR	SBF1	0.373372	7.6211e-19
TICRR	SUN2	0.289163	1.36993e-11
TICRR	CYB5R3	0.108514	0.0127679
TICRR	DNAL4	0.186607	1.65126e-05
TICRR	MIOX	0.18795	1.43099e-05
TICRR	LMF2	0.238377	3.12885e-08
TICRR	RHBDD3	0.3743	6.1545e-19
TICRR	PACSIN2	0.18246	2.55254e-05
TICRR	TTLL1	0.144181	0.000912413
TICRR	RASL10A	0.181782	2.7386e-05
TICRR	AP1B1	0.363884	6.5165e-18
TICRR	HMGXB4	0.560131	8.9304e-45
TICRR	TOM1	0.154961	0.000360953
TICRR	NEFH	0.317047	9.54485e-14
TICRR	CHKB	0.142275	0.00106816
TICRR	BIK	0.286369	2.18878e-11
TICRR	HMOX1	0.213429	7.79917e-07
TICRR	MCAT	0.286148	2.27123e-11
TICRR	THOC5	0.387235	2.90992e-20
TICRR	MCM5	0.655666	6.07954e-66
TICRR	ARSA	0.115774	0.00786396
TICRR	RASD2	0.24491	1.26706e-08
TICRR	TTLL12	0.406308	2.50781e-22
TICRR	CBX7	-0.129588	0.00290559
TICRR	PDGFB	0.338449	1.45772e-15
TICRR	ACR	0.227166	1.38981e-07
TICRR	CABP7	0.14729	0.000702709
TICRR	RPL3	0.0867466	0.0467539
TICRR	ZMAT5	0.131188	0.00257283
TICRR	RBFOX2	0.366554	3.58832e-18
TICRR	SYNGR1	0.142421	0.00105546
TICRR	TAB1	0.295801	4.4062e-12
TICRR	ASCC2	0.322499	3.39366e-14
TICRR	MTMR3	0.163924	0.00015926
TICRR	MIEF1	0.499896	1.32617e-34
TICRR	APOL4	0.14948	0.000582889
TICRR	PNPLA5	0.194457	7.05051e-06
TICRR	APOL1	0.310324	3.31915e-13
TICRR	PNPLA3	0.326438	1.58683e-14
TICRR	MYH9	0.377459	2.9581e-19
TICRR	CACNA1I	0.236464	4.0569e-08
TICRR	SAMM50	0.361609	1.07879e-17
TICRR	TXN2	0.190738	1.05976e-05
TICRR	FOXRED2	0.466292	9.41524e-30
TICRR	EIF3D	0.336423	2.19667e-15
TICRR	TNRC6B	0.35137	9.92416e-17
TICRR	SGSM3	0.199374	4.06495e-06
TICRR	IFT27	0.111864	0.0102426
TICRR	PVALB	-0.10909	0.0122986
TICRR	KIAA0930	0.380598	1.41673e-19
TICRR	CSF2RB	0.107239	0.0138654
TICRR	SLC25A17	0.360757	1.30168e-17
TICRR	FAM118A	0.310391	3.27919e-13
TICRR	KCTD17	0.354045	5.60099e-17
TICRR	ST13	0.312726	2.13427e-13
TICRR	IL2RB	0.307579	5.472e-13
TICRR	RBX1	0.186907	1.59939e-05
TICRR	EP300	0.434536	1.22749e-25
TICRR	L3MBTL2	0.343548	5.12425e-16
TICRR	CHADL	-0.0959999	0.0276952
TICRR	RANGAP1	0.564525	1.33422e-45
TICRR	ZC3H7B	0.307749	5.30562e-13
TICRR	PHF5A	0.350551	1.1811e-16
TICRR	ACO2	0.329805	8.21271e-15
TICRR	TRMU	0.480366	1.01689e-31
TICRR	PMM1	-0.0937941	0.0314949
TICRR	DESI1	0.204935	2.14424e-06
TICRR	CERK	0.222641	2.48351e-07
TICRR	BRD1	0.31069	3.104e-13
TICRR	ZBED4	0.505204	2.02263e-35
TICRR	HDAC10	0.228073	1.23536e-07
TICRR	KCNK10	0.0989442	0.0232423
TICRR	ABHD4	0.278808	7.58169e-11
TICRR	KHNYN	0.478068	2.16111e-31
TICRR	FKBP3	0.442896	1.11517e-26
TICRR	SDR39U1	0.333275	4.12958e-15
TICRR	CTSG	-0.273537	1.76339e-10
TICRR	GZMH	0.163542	0.000165048
TICRR	GZMB	0.407743	1.73163e-22
TICRR	RBM23	0.382663	8.69174e-20
TICRR	PRMT5	0.487666	8.9261e-33
TICRR	COCH	0.432244	2.34211e-25
TICRR	AP4S1	0.18778	1.45729e-05
TICRR	POLE2	0.733228	8.0382e-90
TICRR	VCPKMT	0.341401	7.97656e-16
TICRR	SOS2	0.313261	1.93333e-13
TICRR	NIN	0.442639	1.20177e-26
TICRR	PYGL	0.477894	2.28693e-31
TICRR	TRIM9	0.327425	1.30932e-14
TICRR	PSMC6	0.401695	8.14482e-22
TICRR	GNPNAT1	0.55101	4.22735e-43
TICRR	DDHD1	0.37572	4.43195e-19
TICRR	CDKN3	0.73799	1.46221e-91
[truncated: 22,269 more rows]

[truncated: 4 more sheets: Table S11, Table S12, Table S13, Table S14]
